# Supplementary material for: Synthesis and spectroscopic properties of β-triazoloporphyrin–xanthone dyads
Source: publisher site journal article supplement (doi:10.3762/bjoc.11.155), 2015-08-17
Supplement: Additional file 2 [file 1860-5397-11-155-S2.pdf]

## **Supporting information File 2**

**for**

### **Synthesis and spectroscopic properties of $\beta$ - triazoloporphyrin–xanthone dyads**

Dileep Kumar Singh and Mahendra Nath\*

Address: Department of Chemistry, University of Delhi, Delhi 110 007, India

Email: Mahendra Nath\* - mnath@chemistry.du.ac.in

\*Corresponding author

**$^1\text{H}$  and  $^{13}\text{C}$  NMR spectra of newly synthesized compounds**

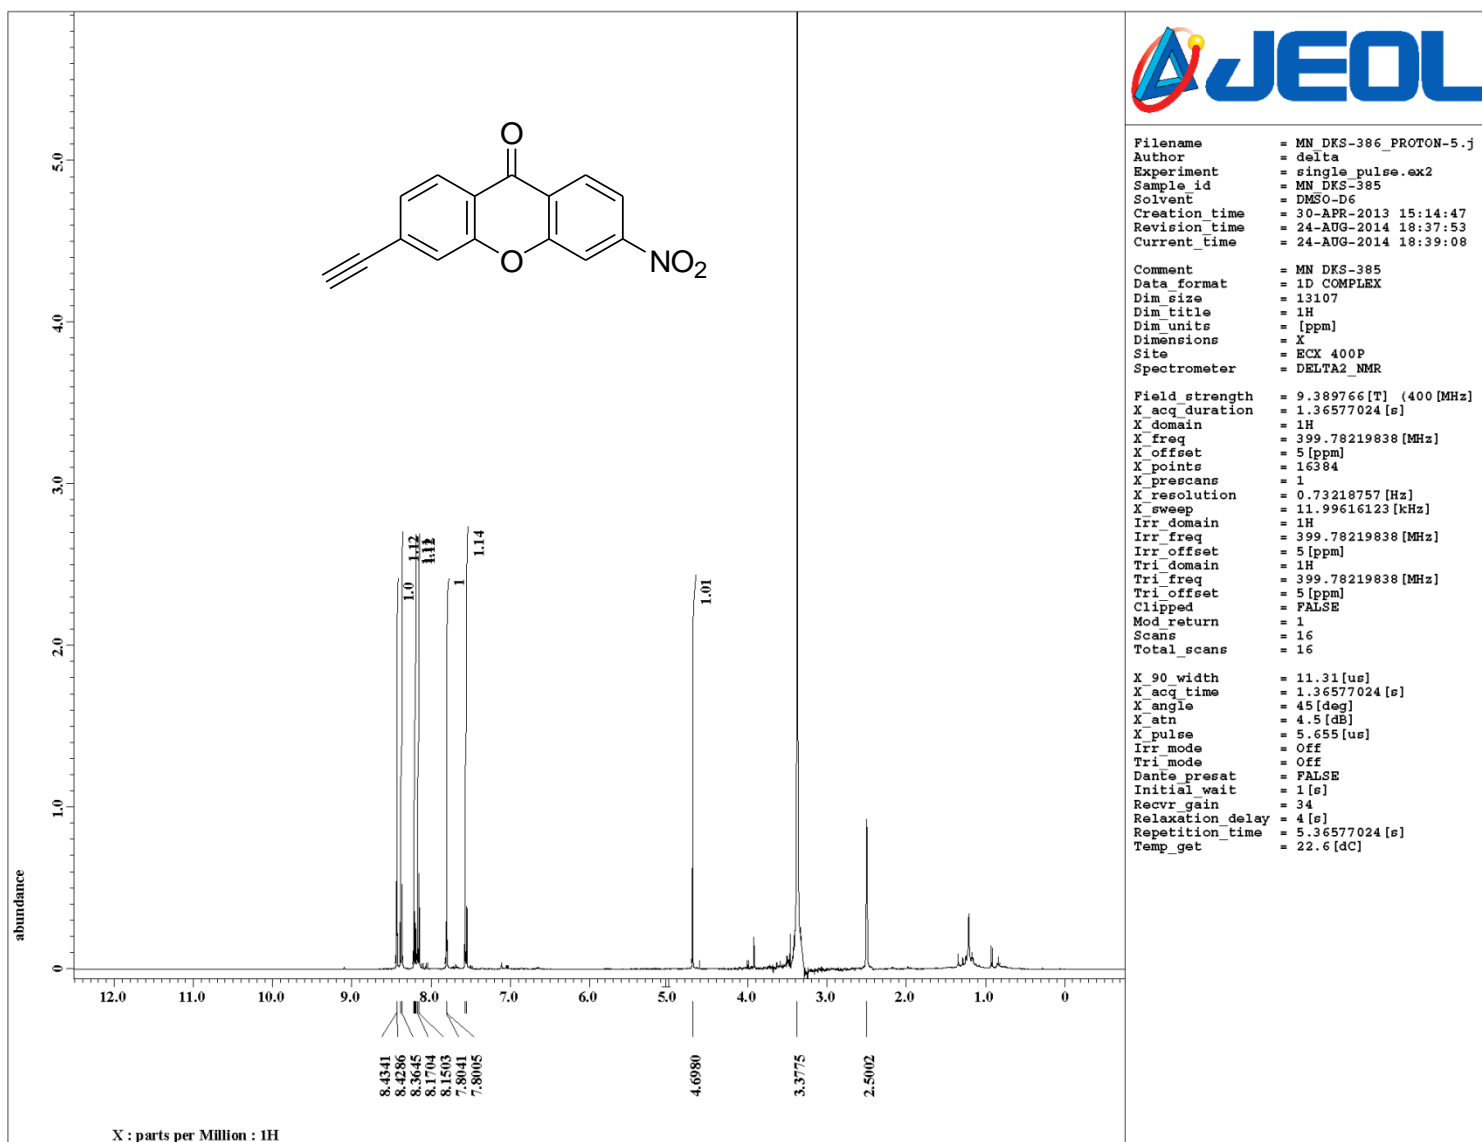

Figure S1: <sup>1</sup>H NMR spectrum of compound 4 in DMSO-*d*<sub>6</sub>.

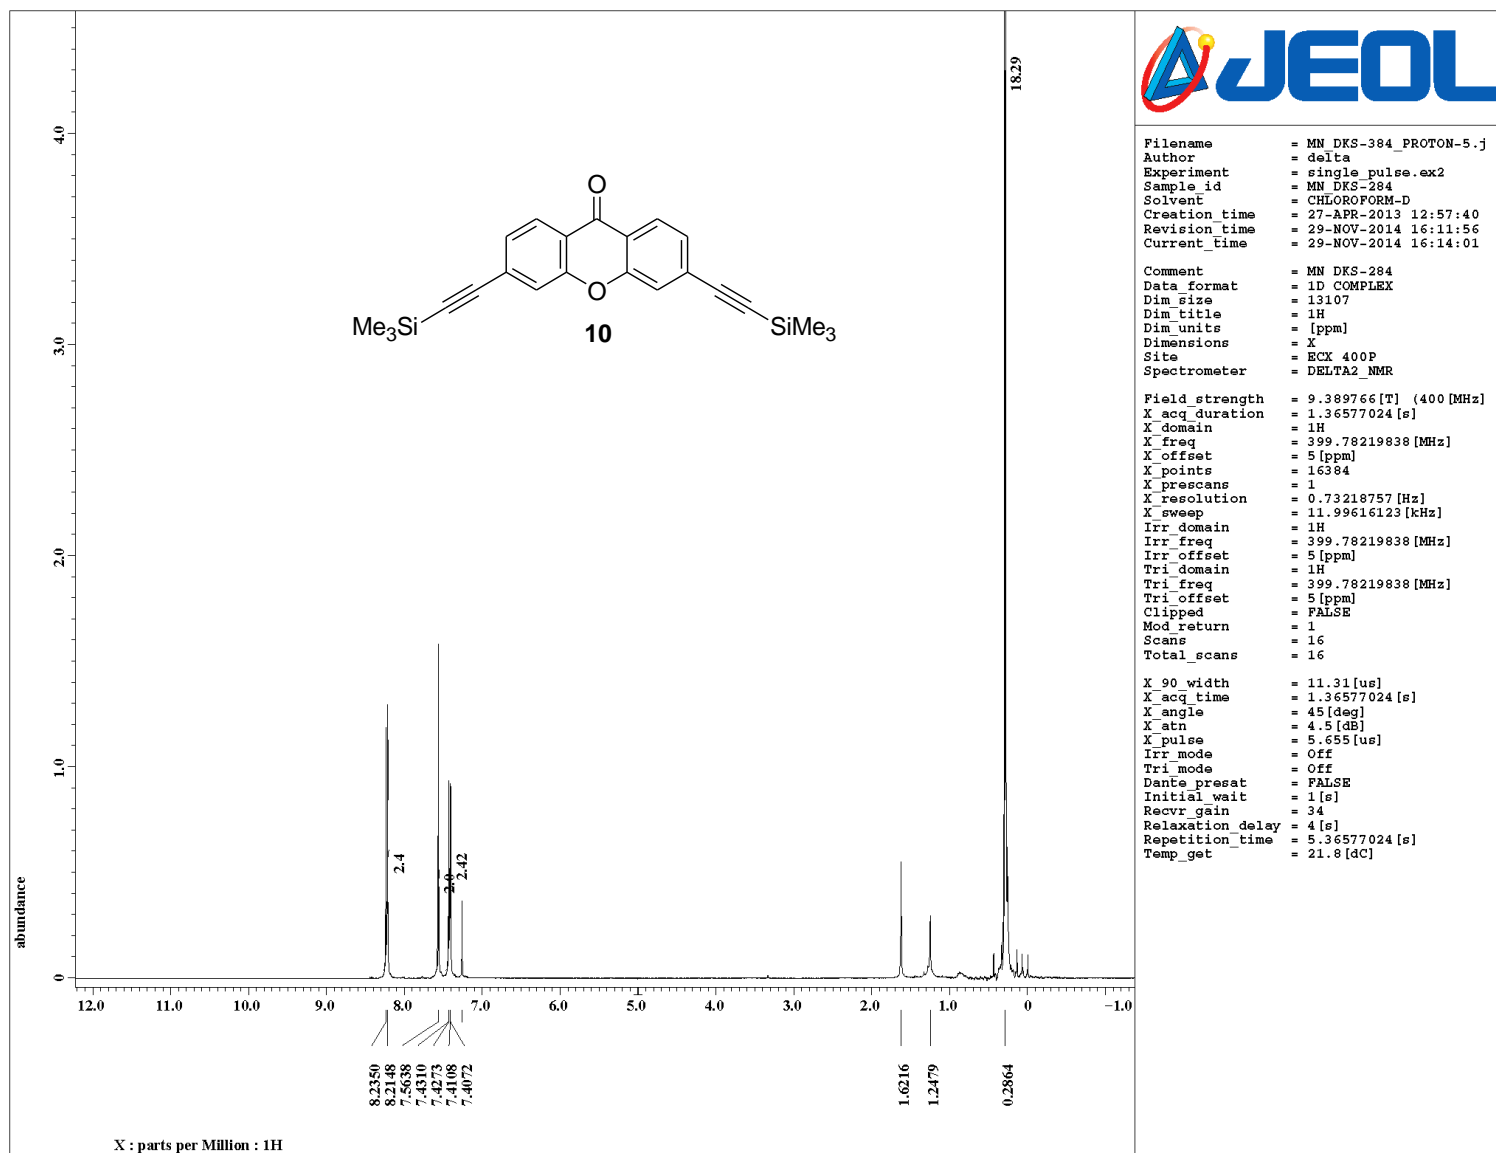

**Figure S2:**  $^1\text{H}$  NMR spectrum of compound **10** in  $\text{CDCl}_3$ .

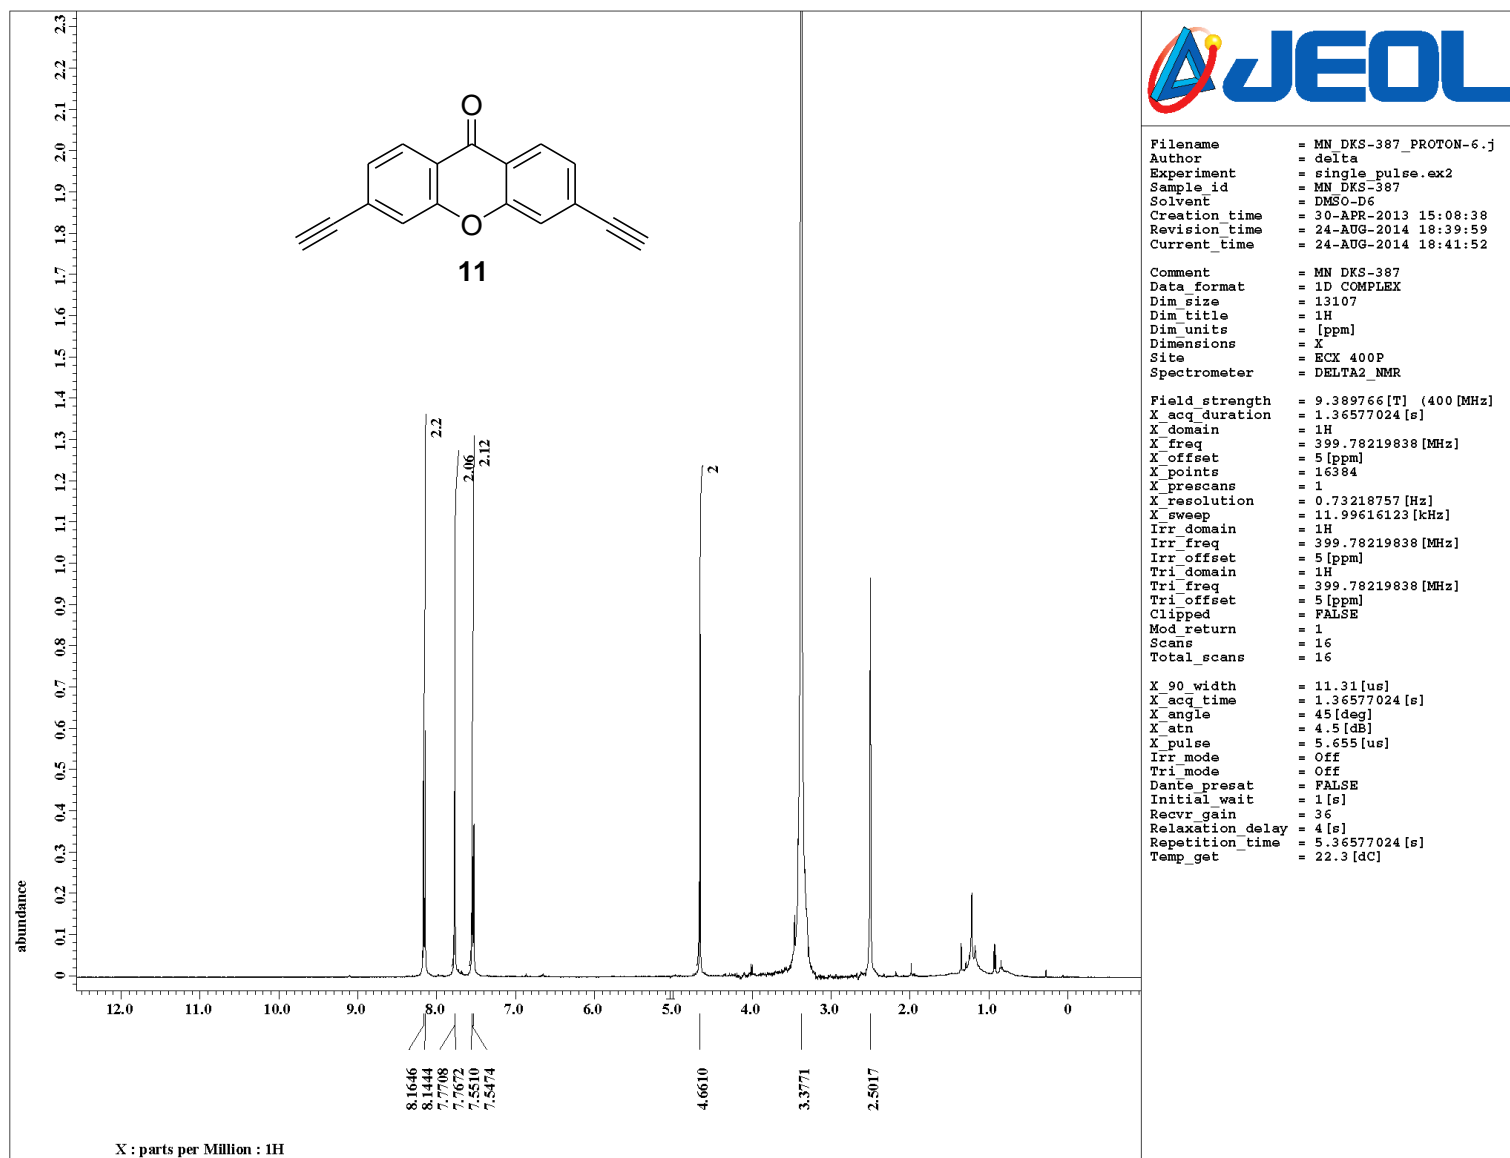

**Figure S3:**  $^1\text{H}$  NMR spectrum of compound **11** in  $\text{DMSO}-d_6$ .

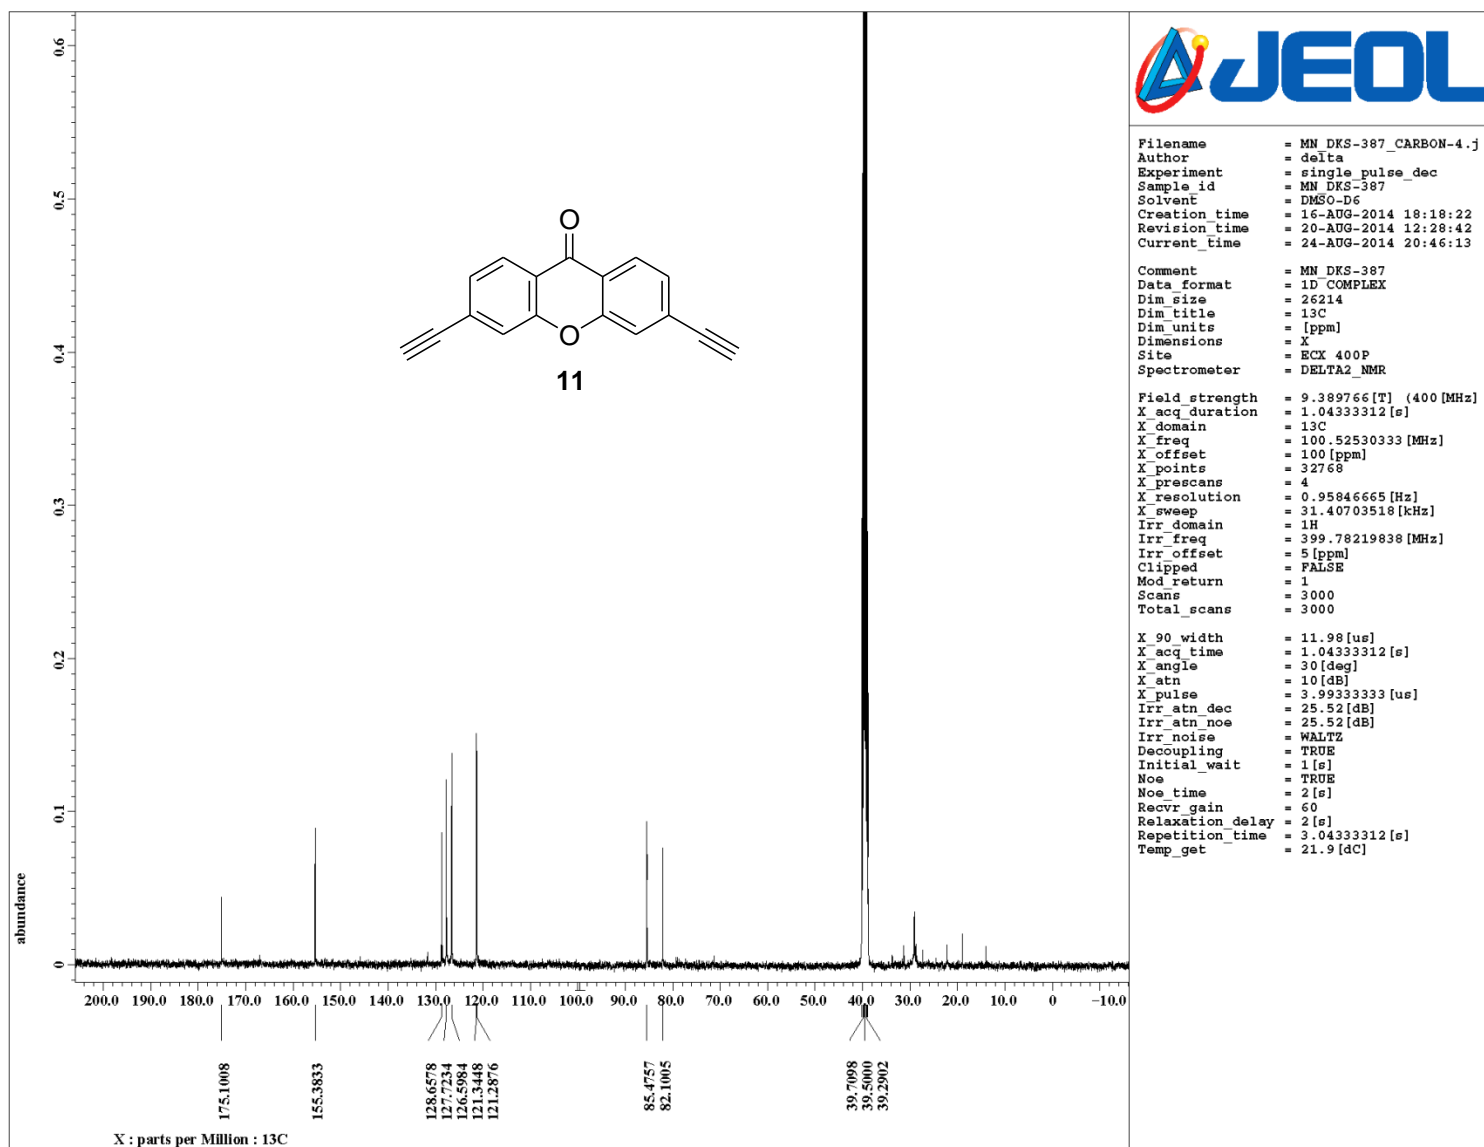

**Figure S4:**  $^{13}\text{C}$  NMR spectrum of compound 11 in  $\text{DMSO-}d_6$ .

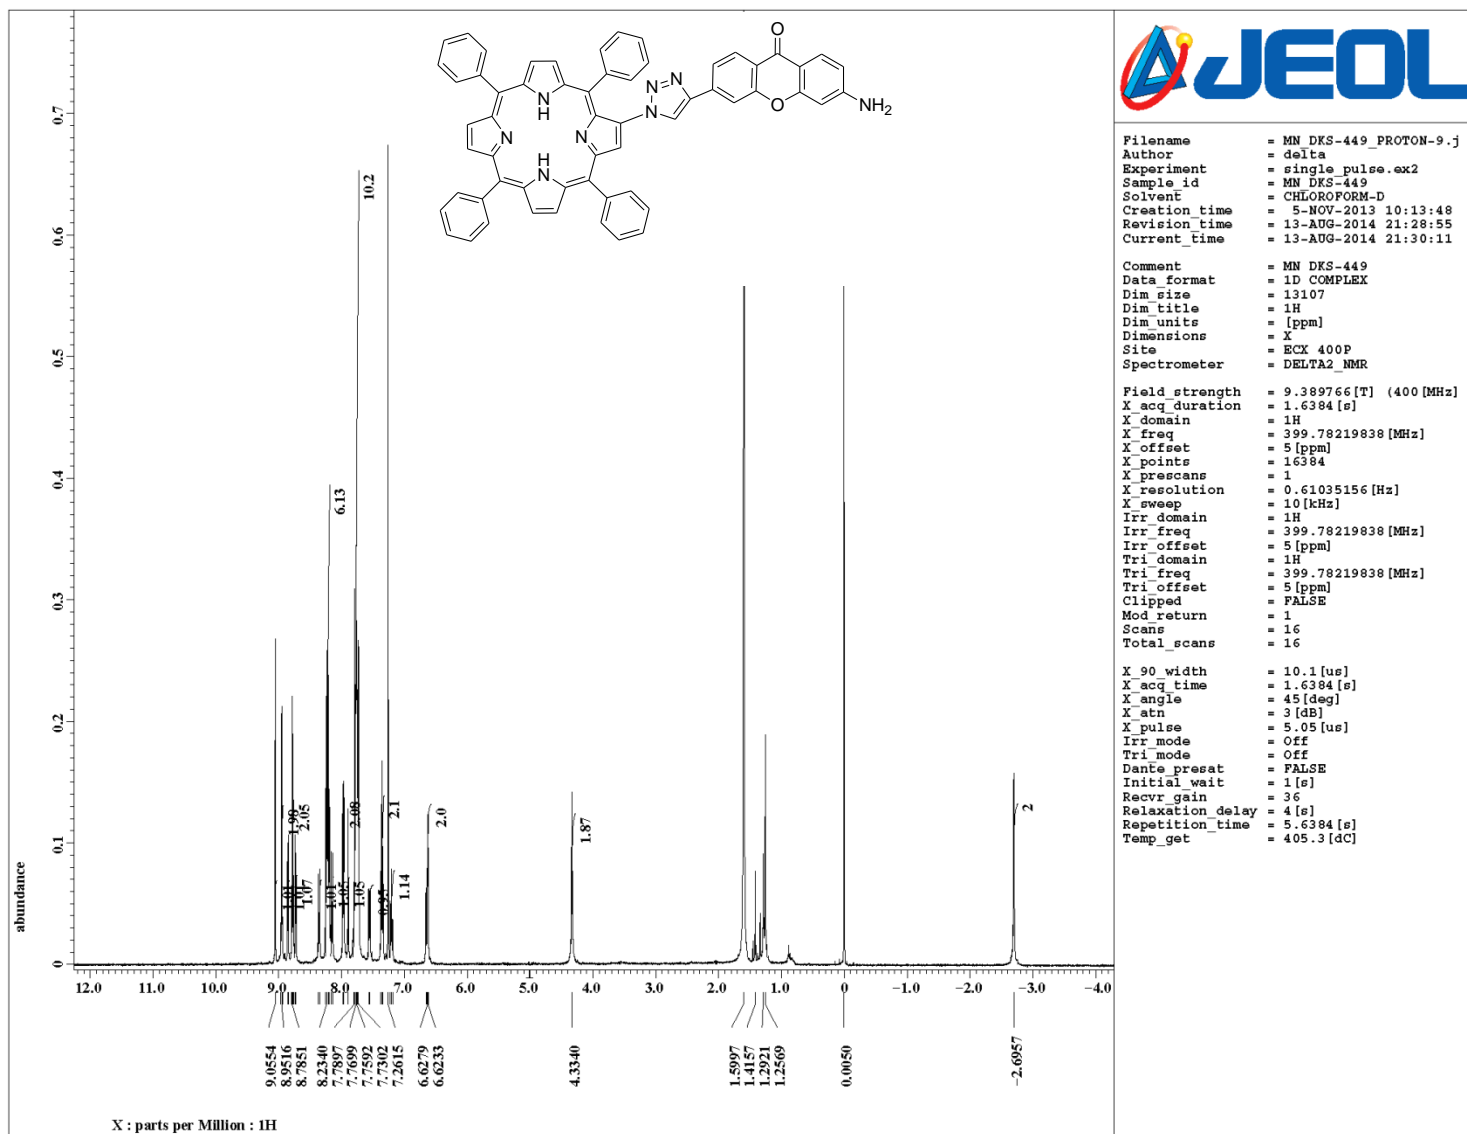

**Figure S5:**  $^1\text{H}$  NMR spectrum of compound **6b** in  $\text{CDCl}_3$ .

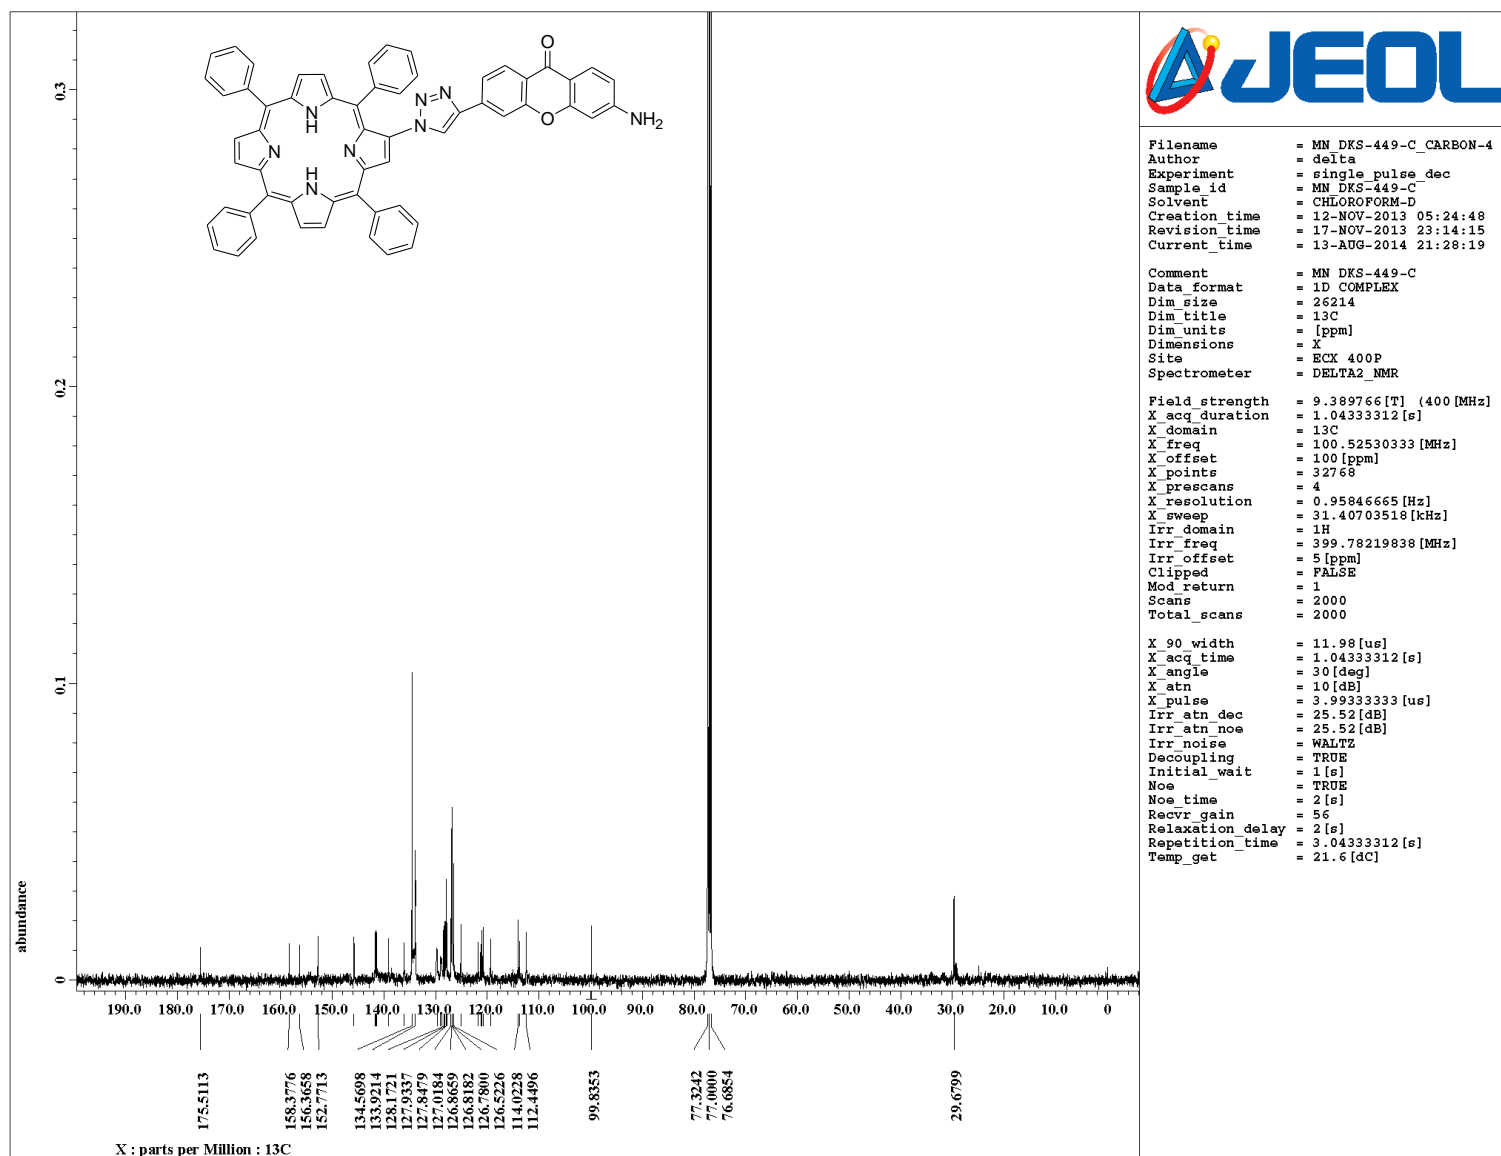

**Figure S6:**  $^{13}\text{C}$  NMR spectrum of compound **6b** in  $\text{CDCl}_3$ .

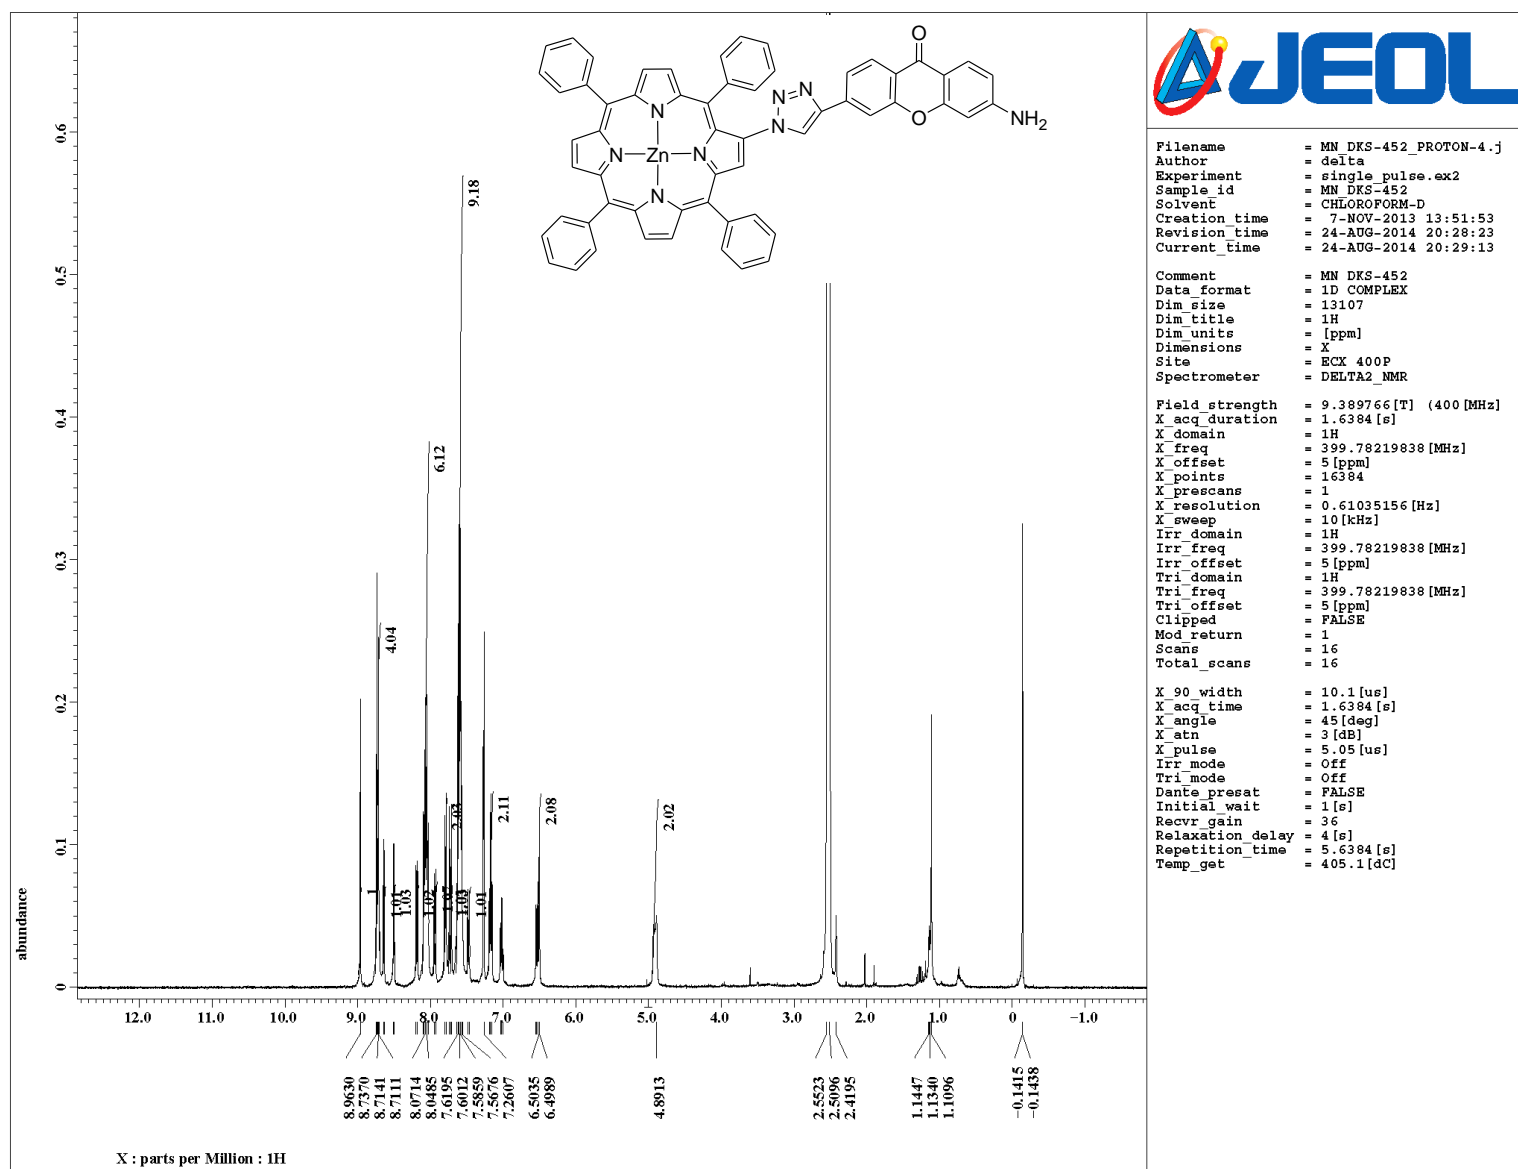

**Figure S7:**  $^1\text{H}$  NMR spectrum of compound **6c** in  $\text{CDCl}_3 + \text{DMSO}-d_6$ .



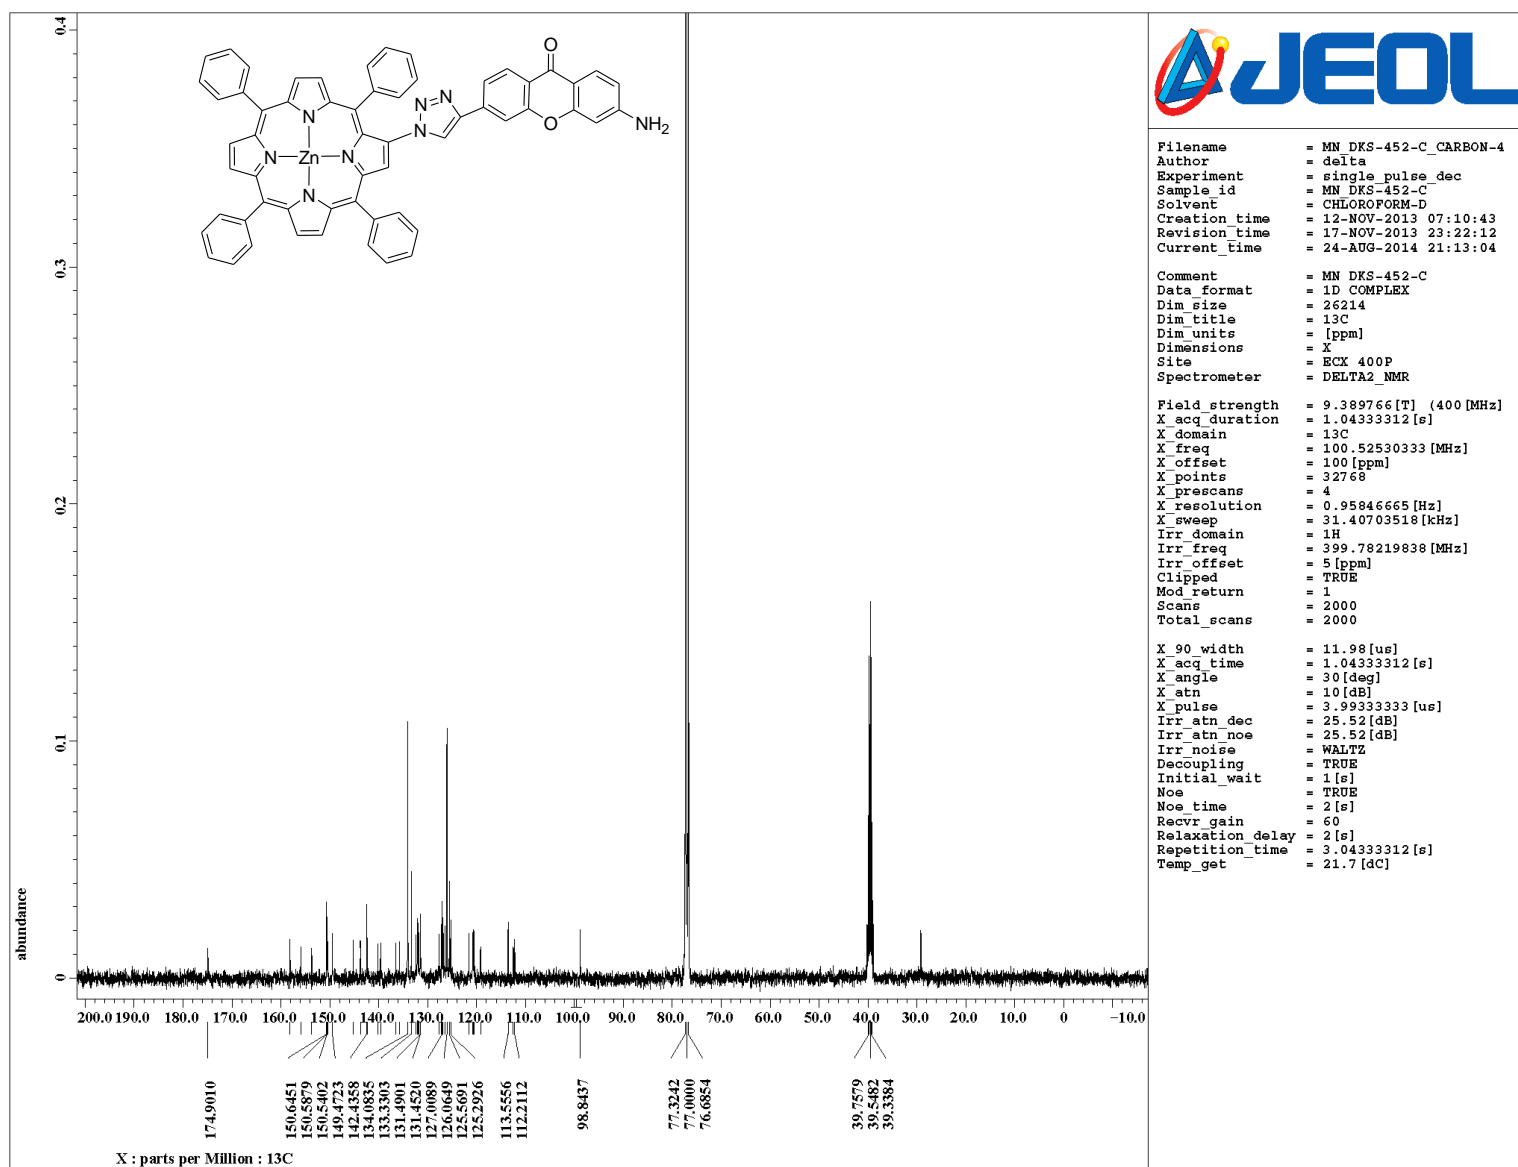

**Figure S8:**  $^{13}\text{C}$  NMR spectrum of compound **6c** in  $\text{CDCl}_3 + \text{DMSO-}d_6$ .

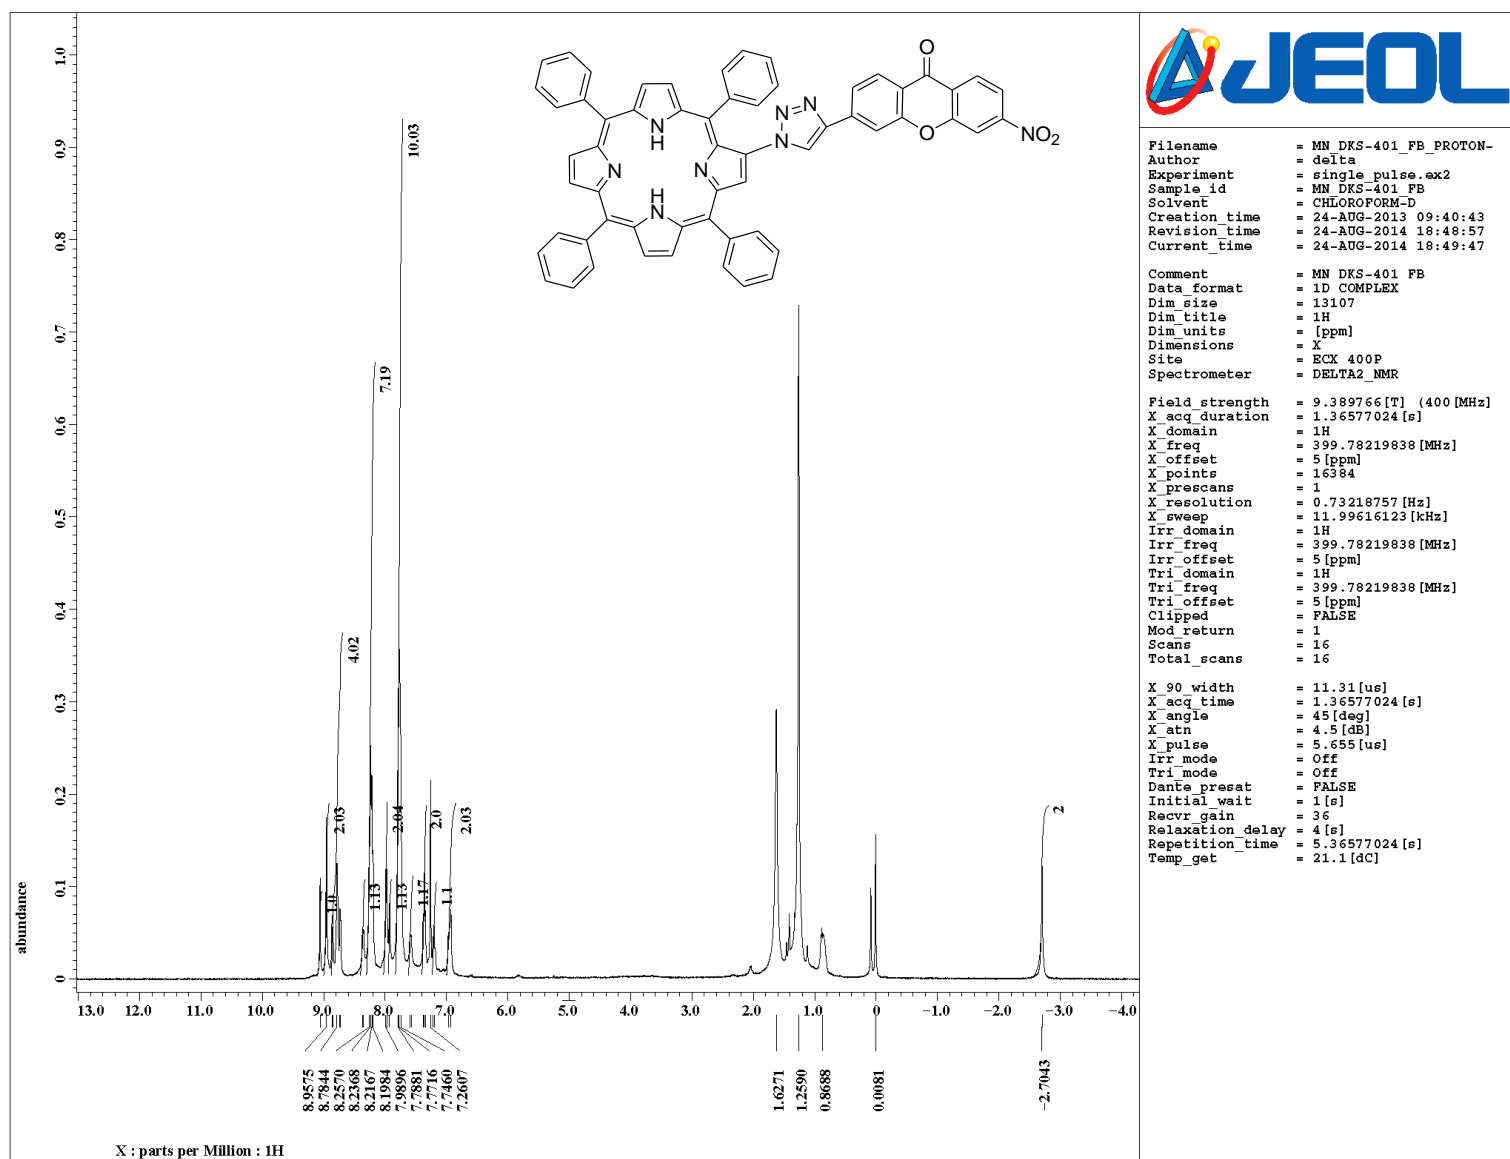

**Figure S9:** <sup>1</sup>H NMR spectrum of compound **6e** in CDCl<sub>3</sub>.



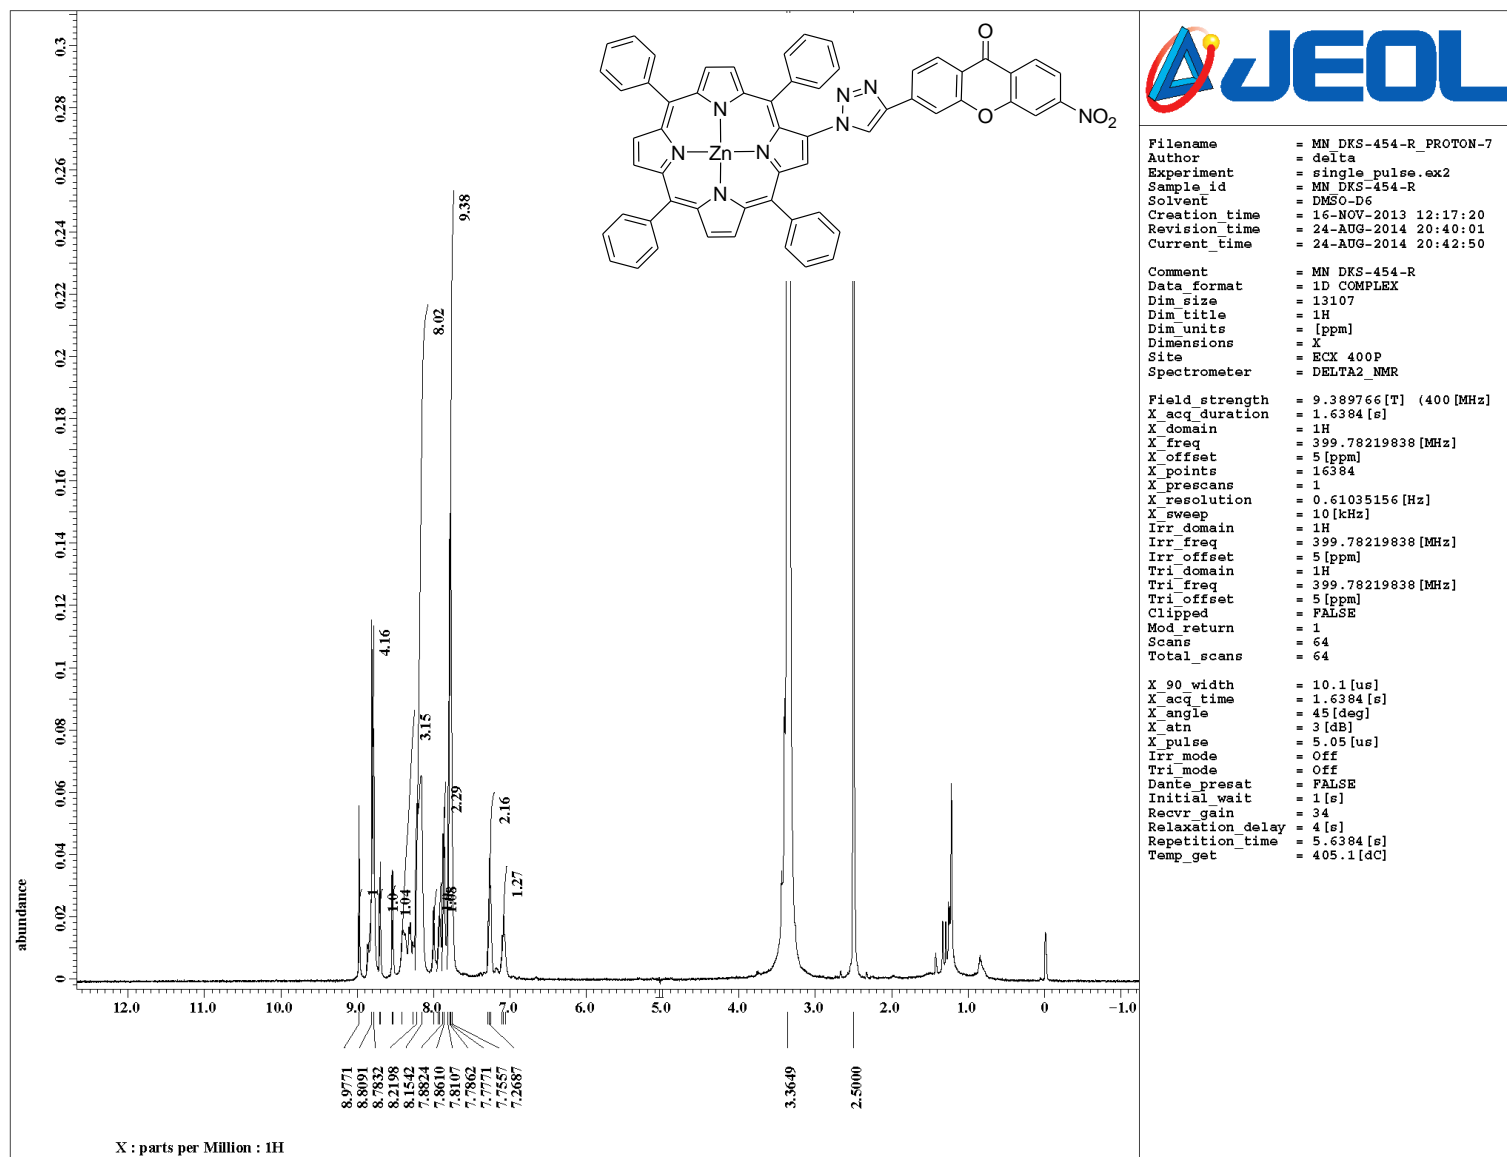

**Figure S11:**  $^1\text{H}$  NMR spectrum of compound **6f** in  $\text{DMSO}-d_6$ .

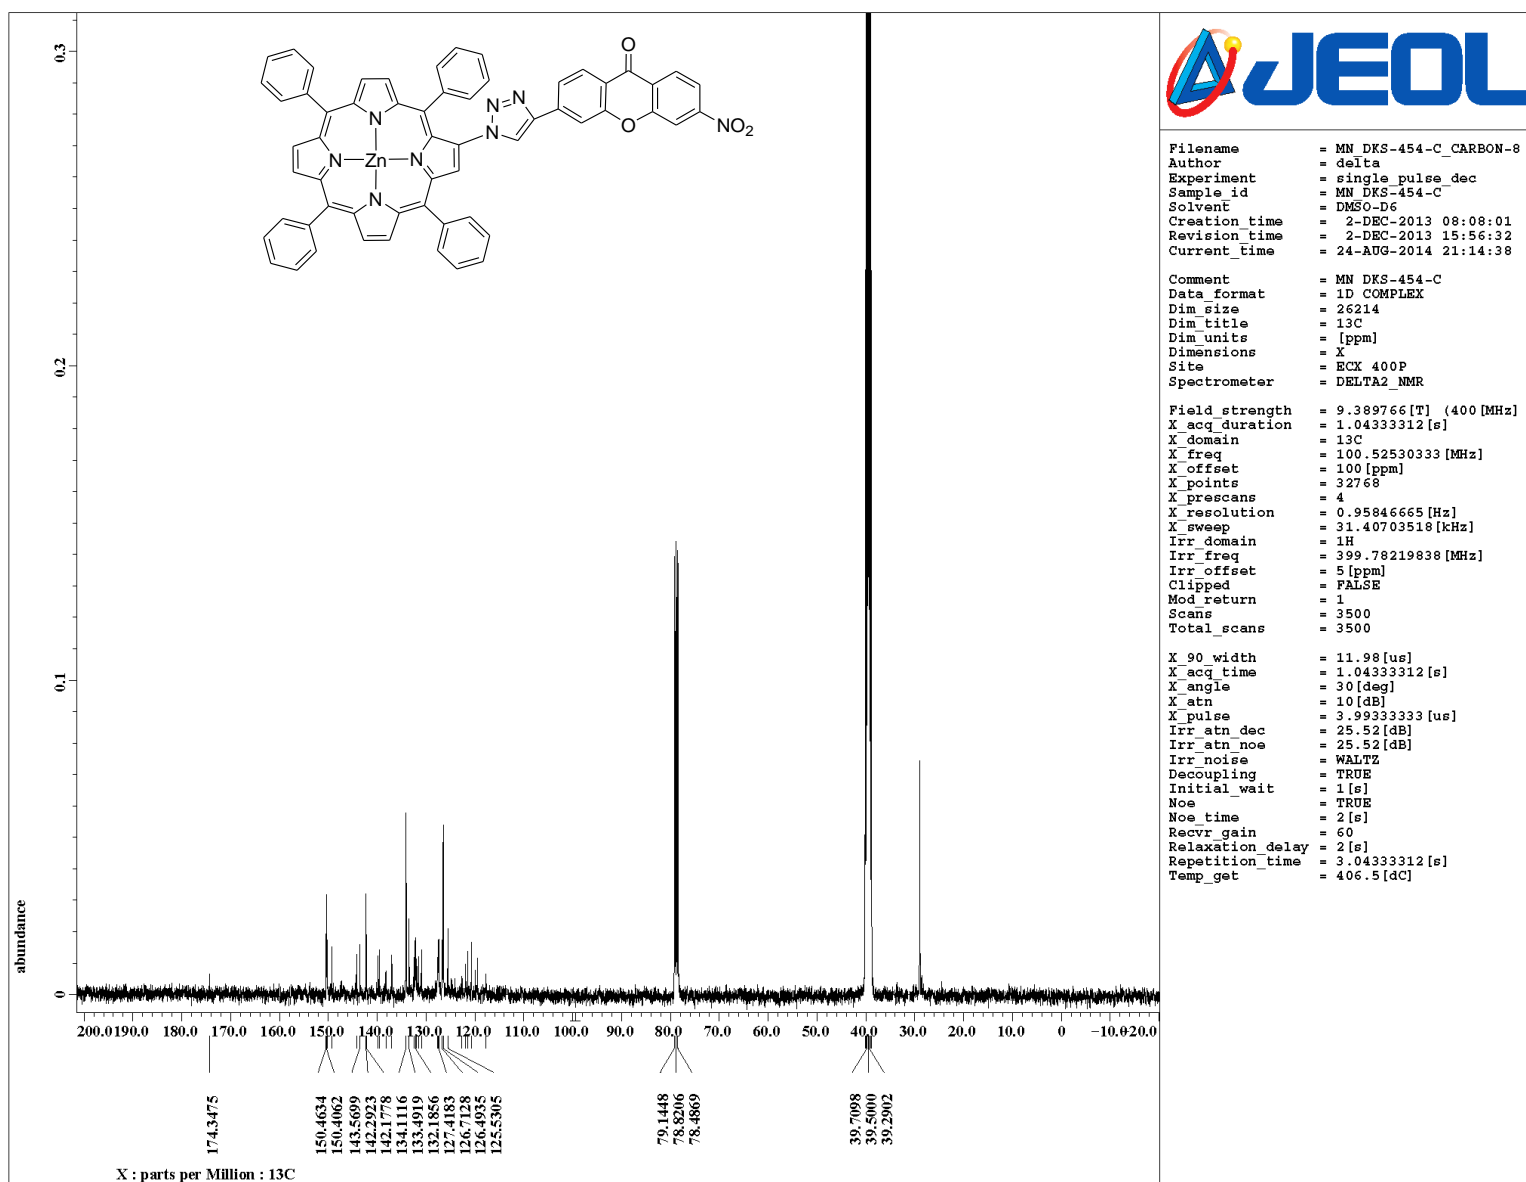

**Figure S12:**  $^{13}\text{C}$  NMR spectrum of compound **6f** in  $\text{CDCl}_3 + \text{DMSO}-d_6$ .

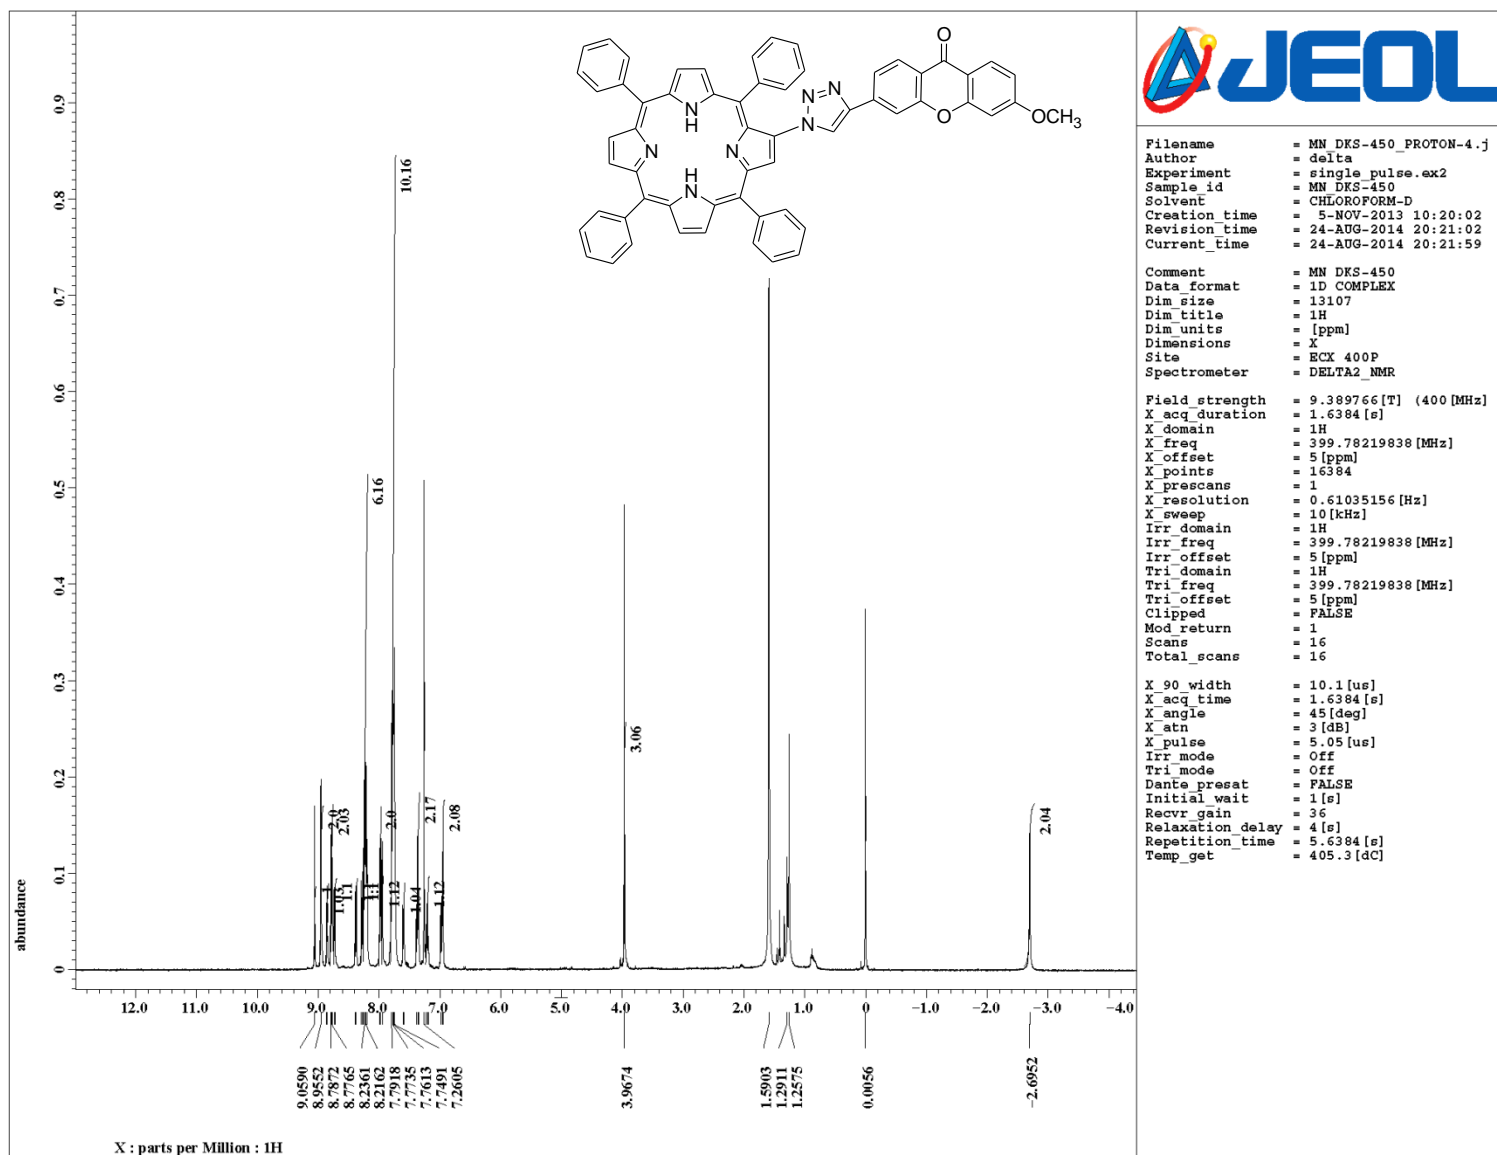

**Figure S13:**  $^1\text{H}$  NMR spectrum of compound **6h** in  $\text{CDCl}_3$ .

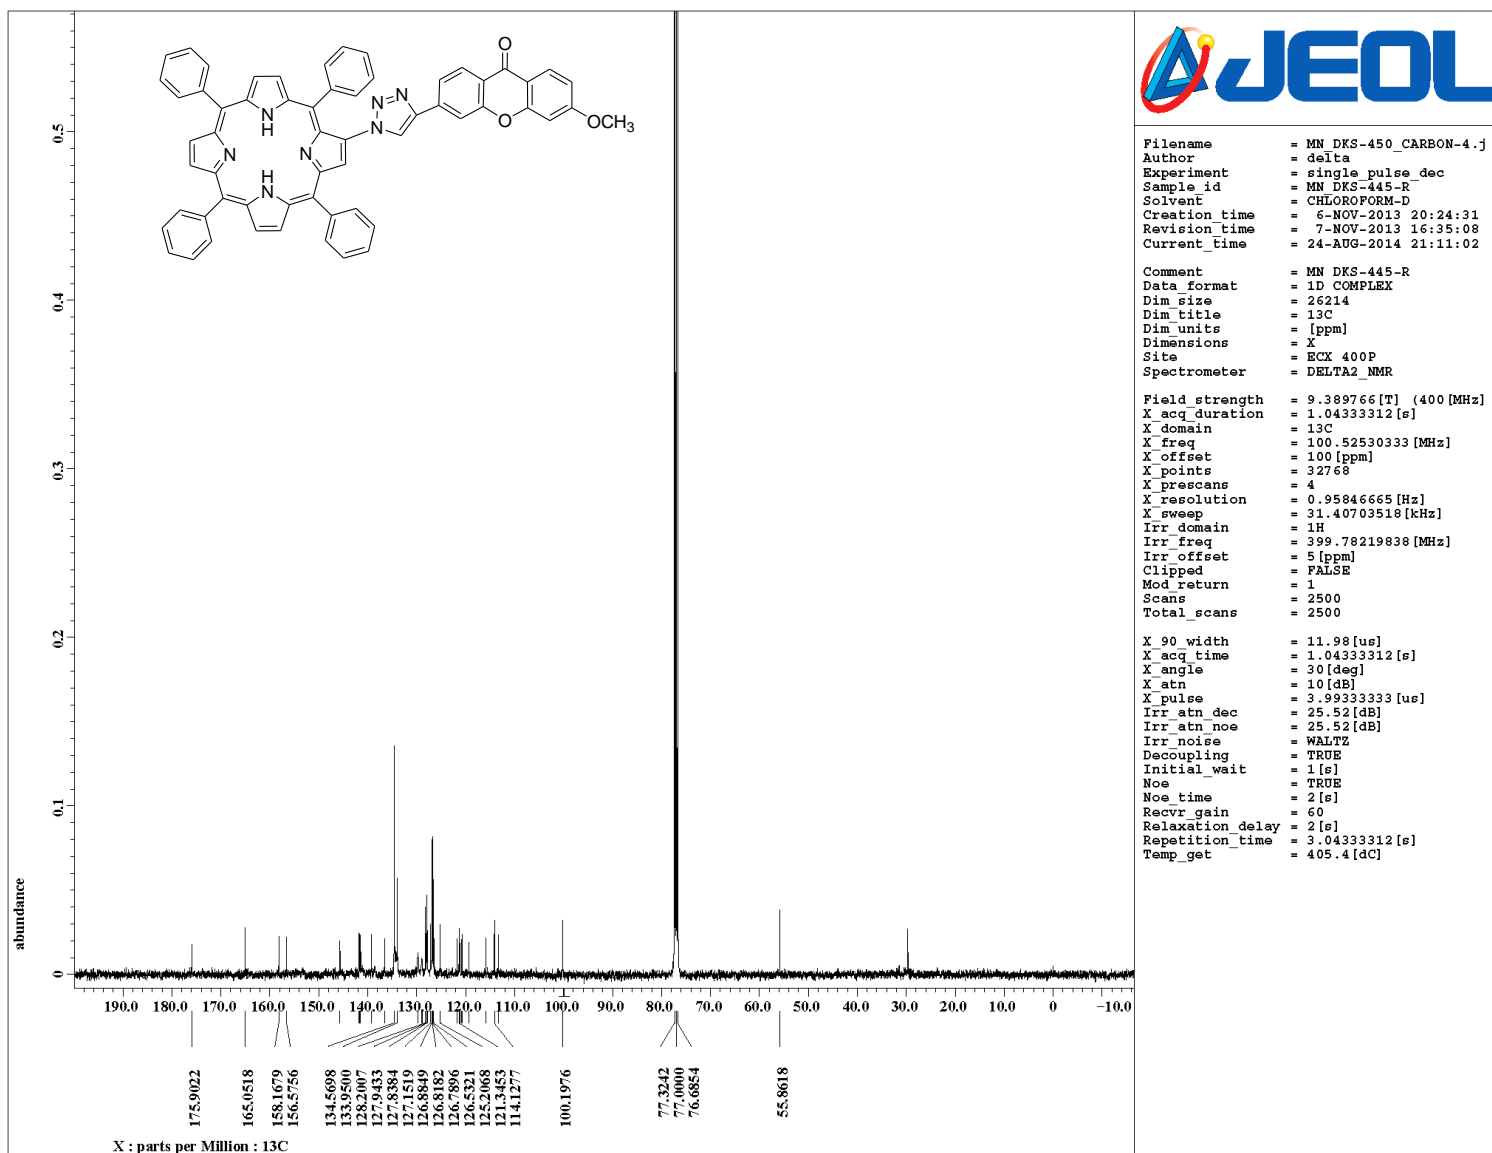

**Figure S14:**  $^{13}\text{C}$  NMR spectrum of compound **6h** in  $\text{CDCl}_3$ .

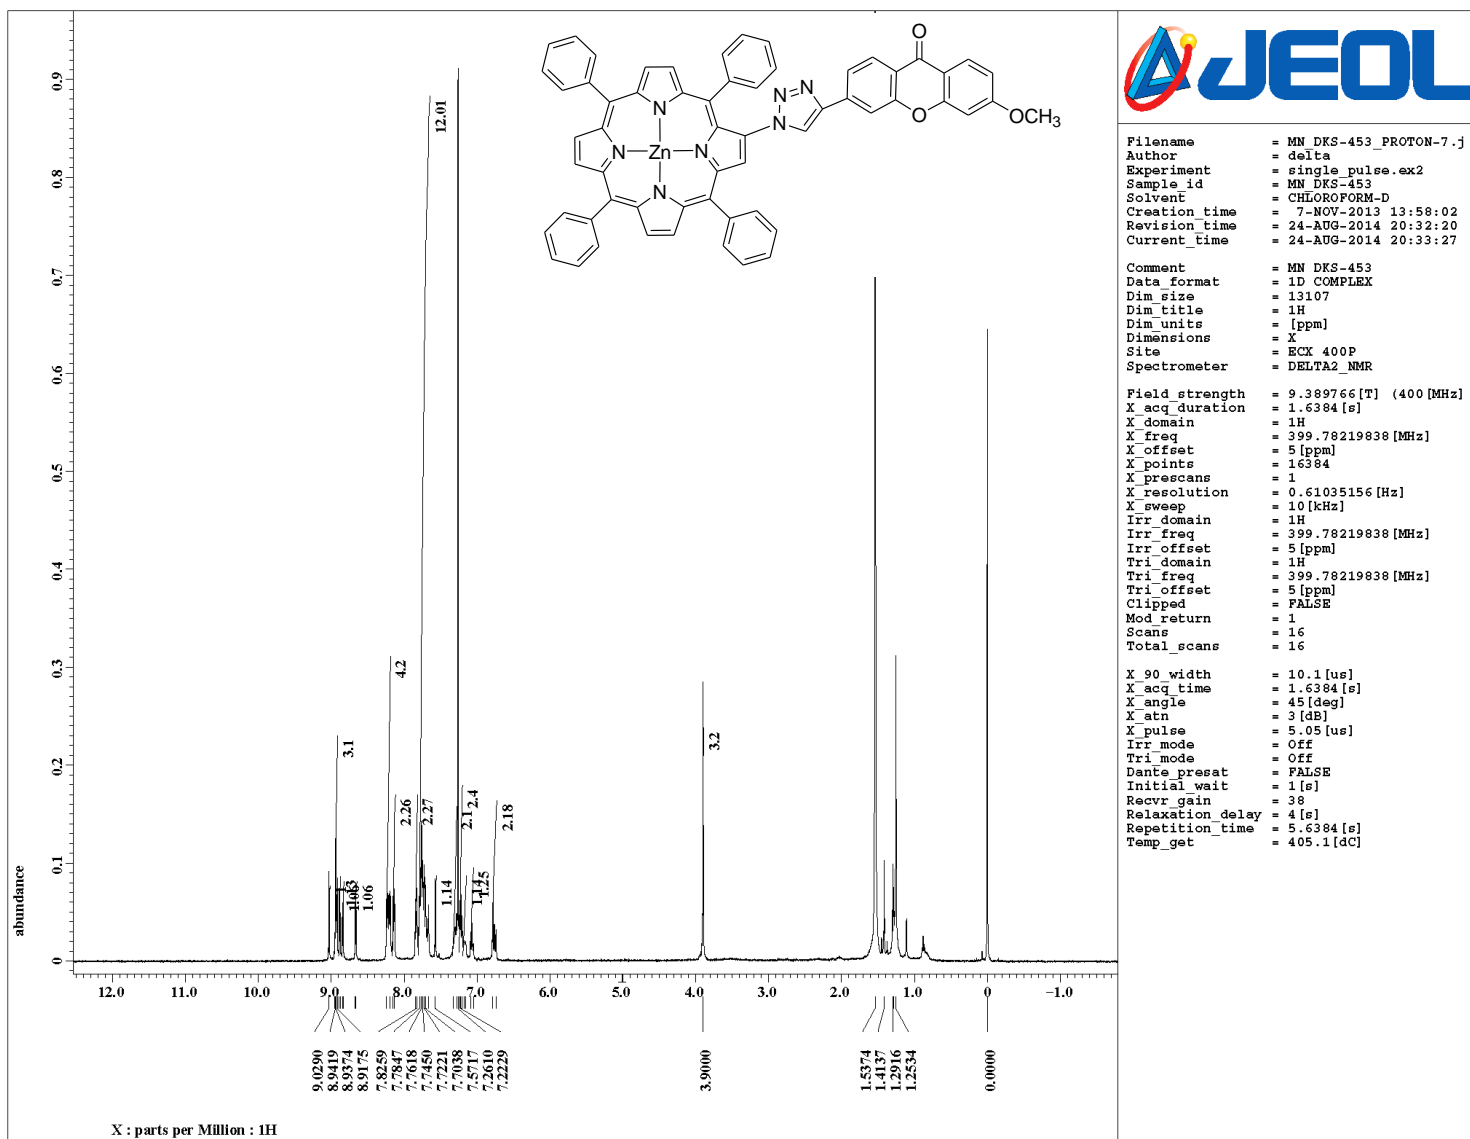

**Figure S15:** <sup>1</sup>H NMR spectrum of compound **6i** in CDCl<sub>3</sub>.



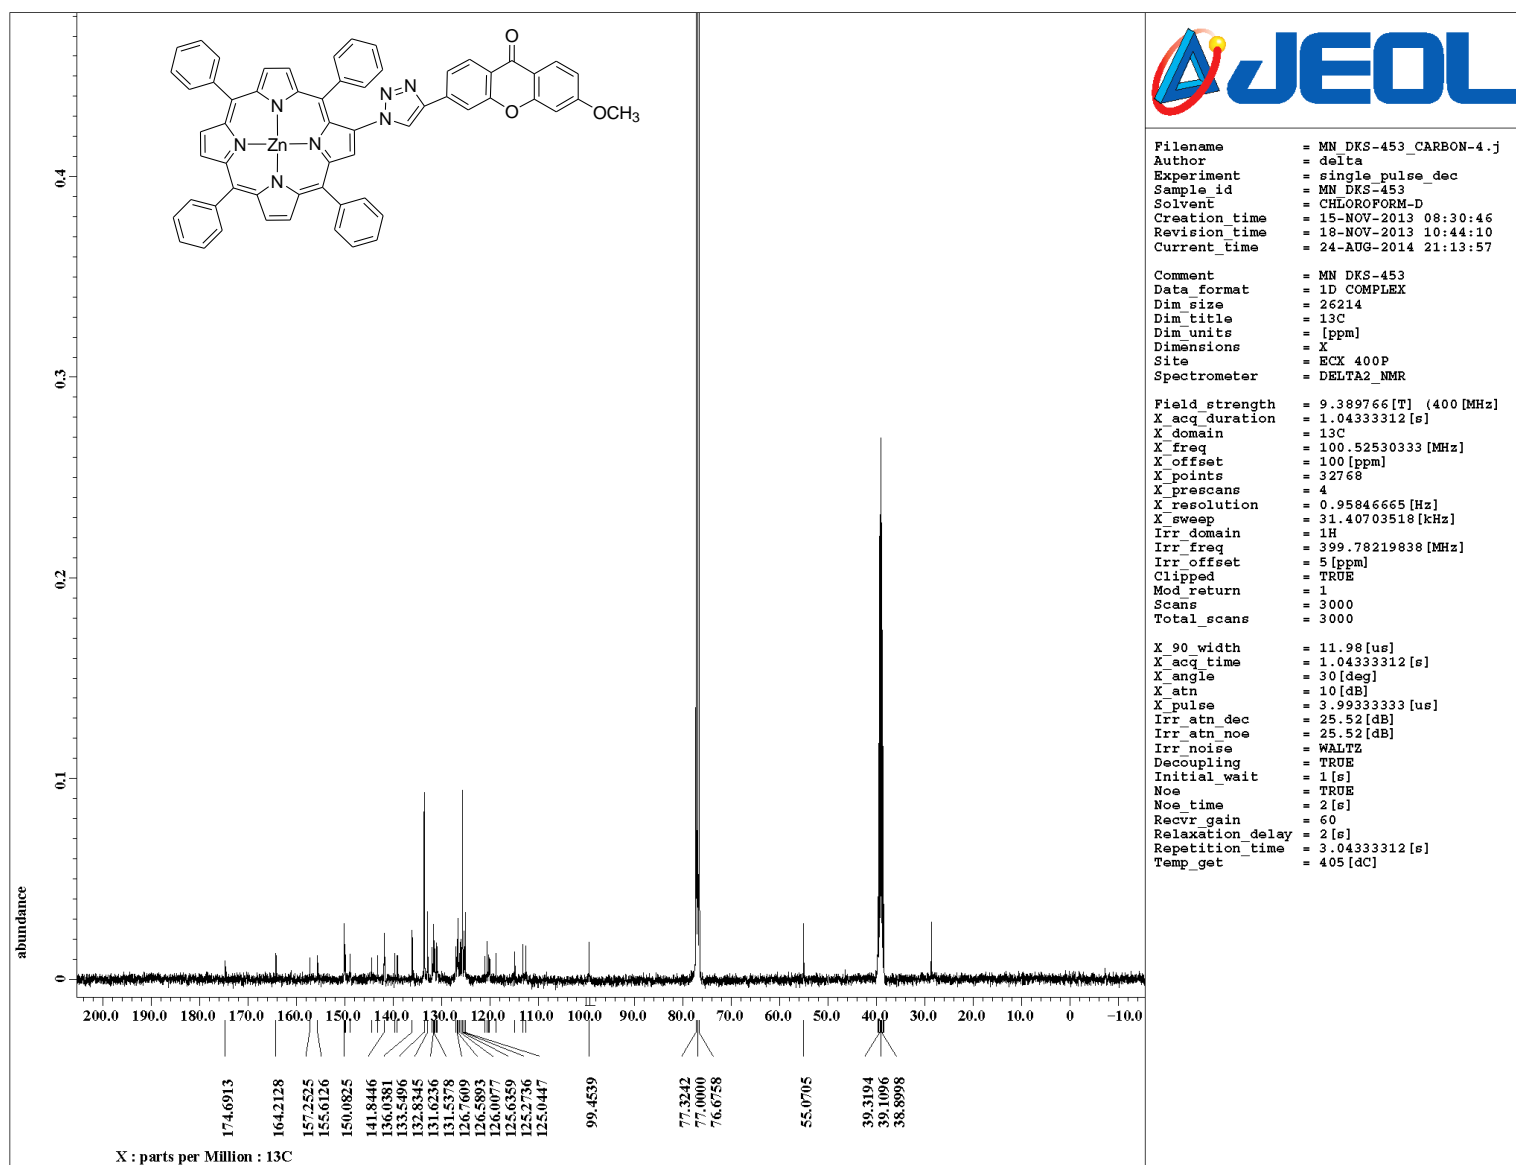

**Figure S16:**  $^{13}\text{C}$  NMR spectrum of compound **6i** in  $\text{CDCl}_3 + \text{DMSO}-d_6$ .

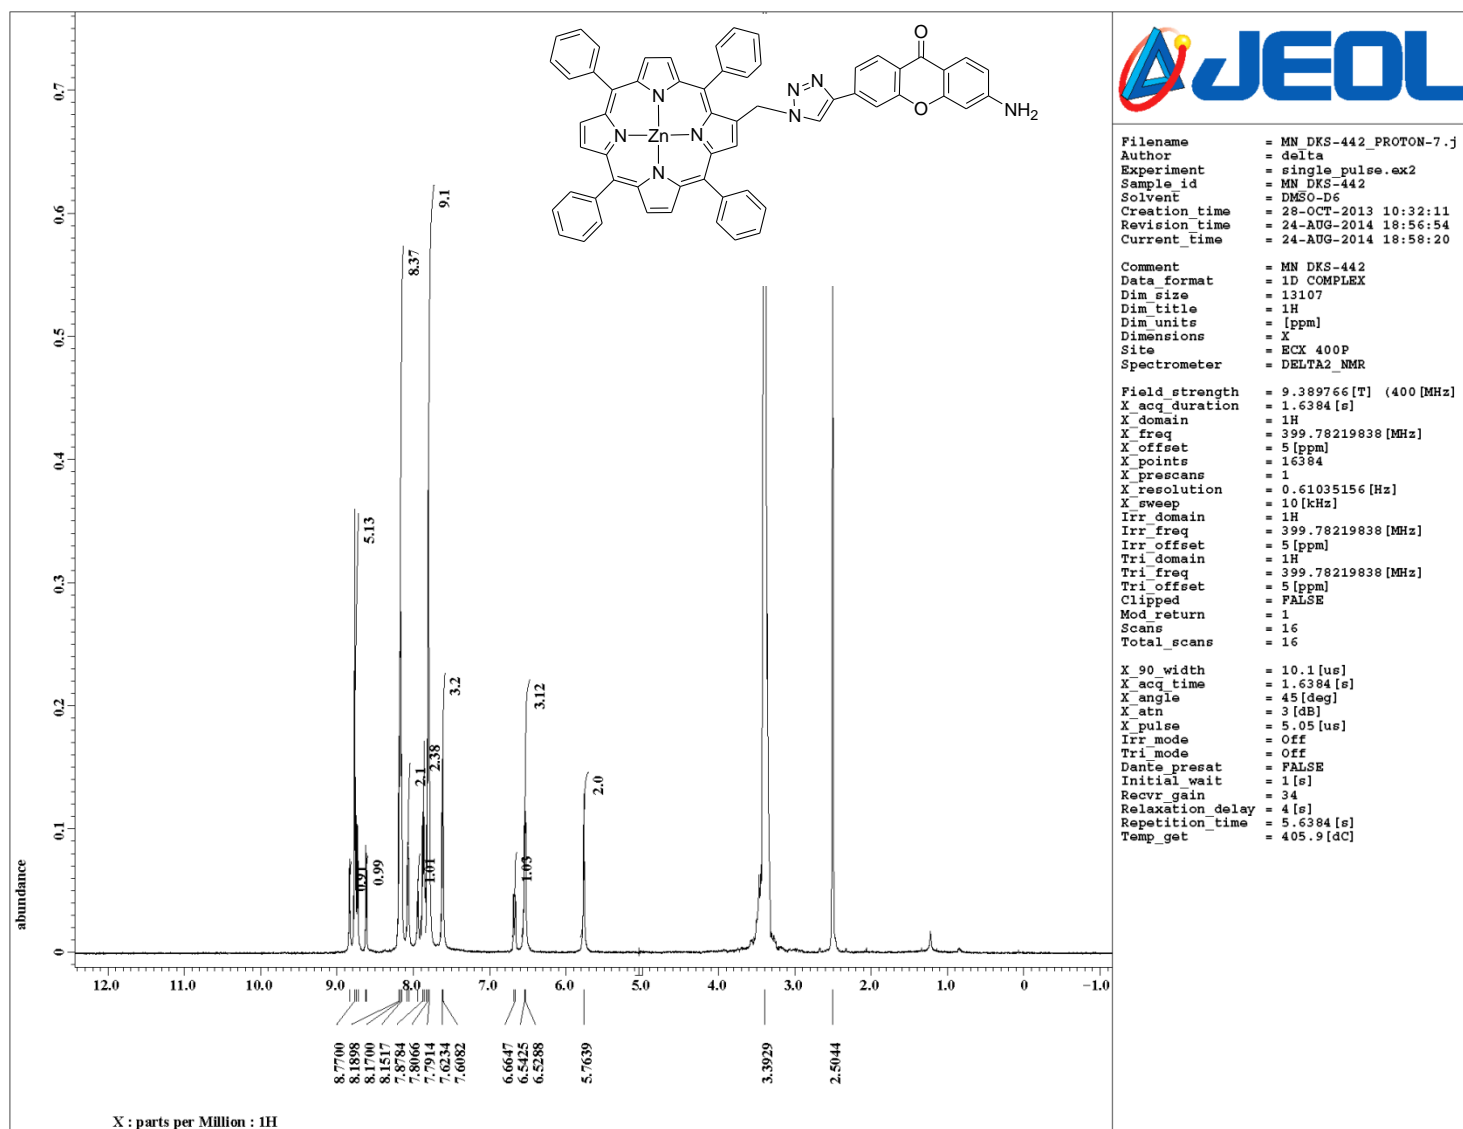

**Figure S17:**  $^1\text{H}$  NMR spectrum of compound **7a** in DMSO-*d*<sub>6</sub>.

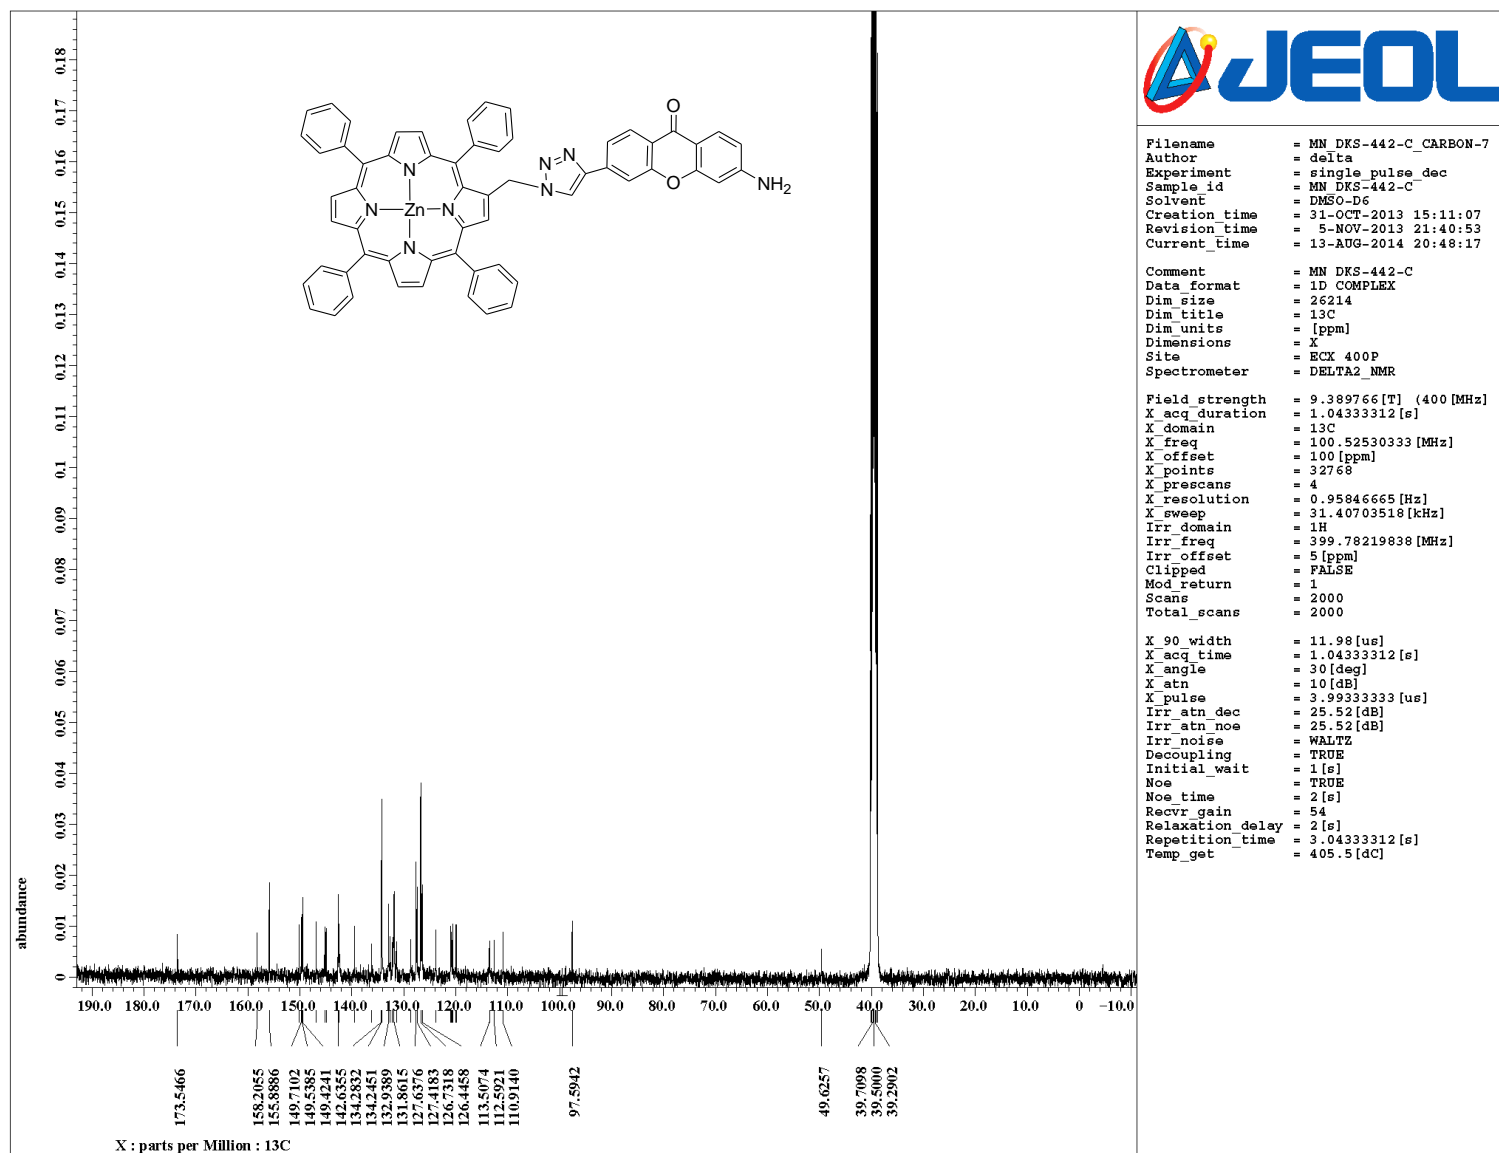

**Figure S18:**  $^{13}\text{C}$  NMR spectrum of compound **7a** in  $\text{DMSO-}d_6$ .

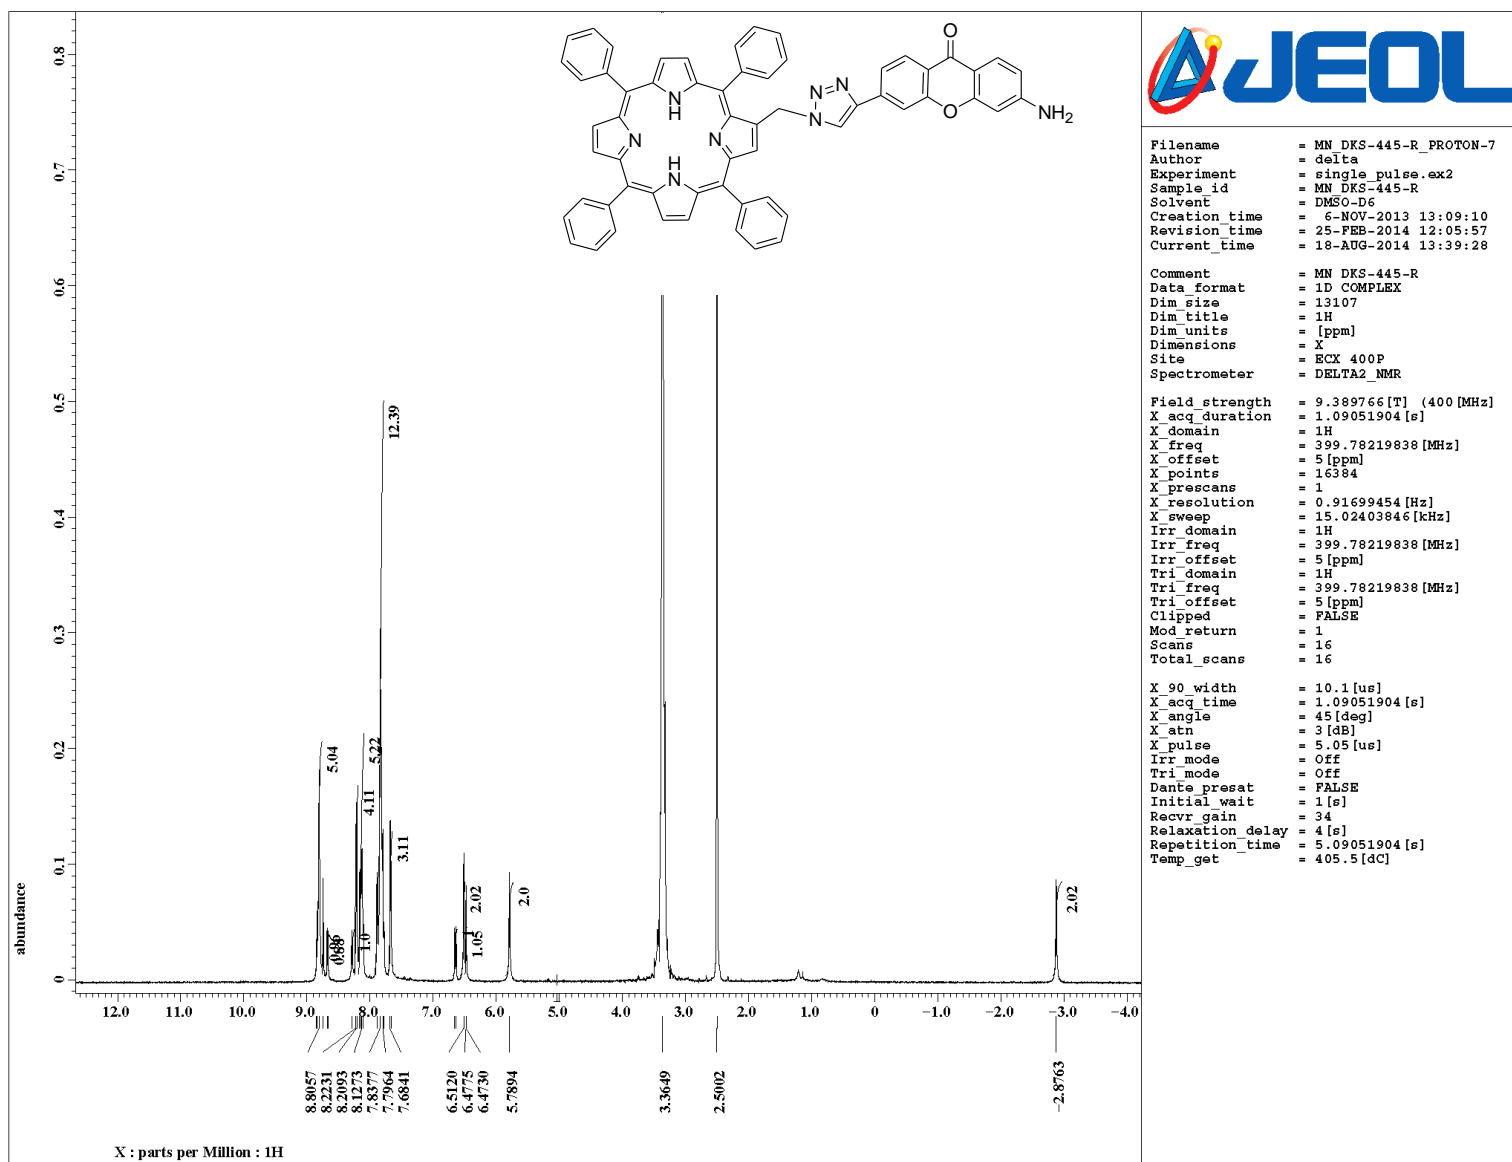

**Figure S19:** <sup>1</sup>H NMR spectrum of compound **7b** in DMSO-*d*<sub>6</sub>.

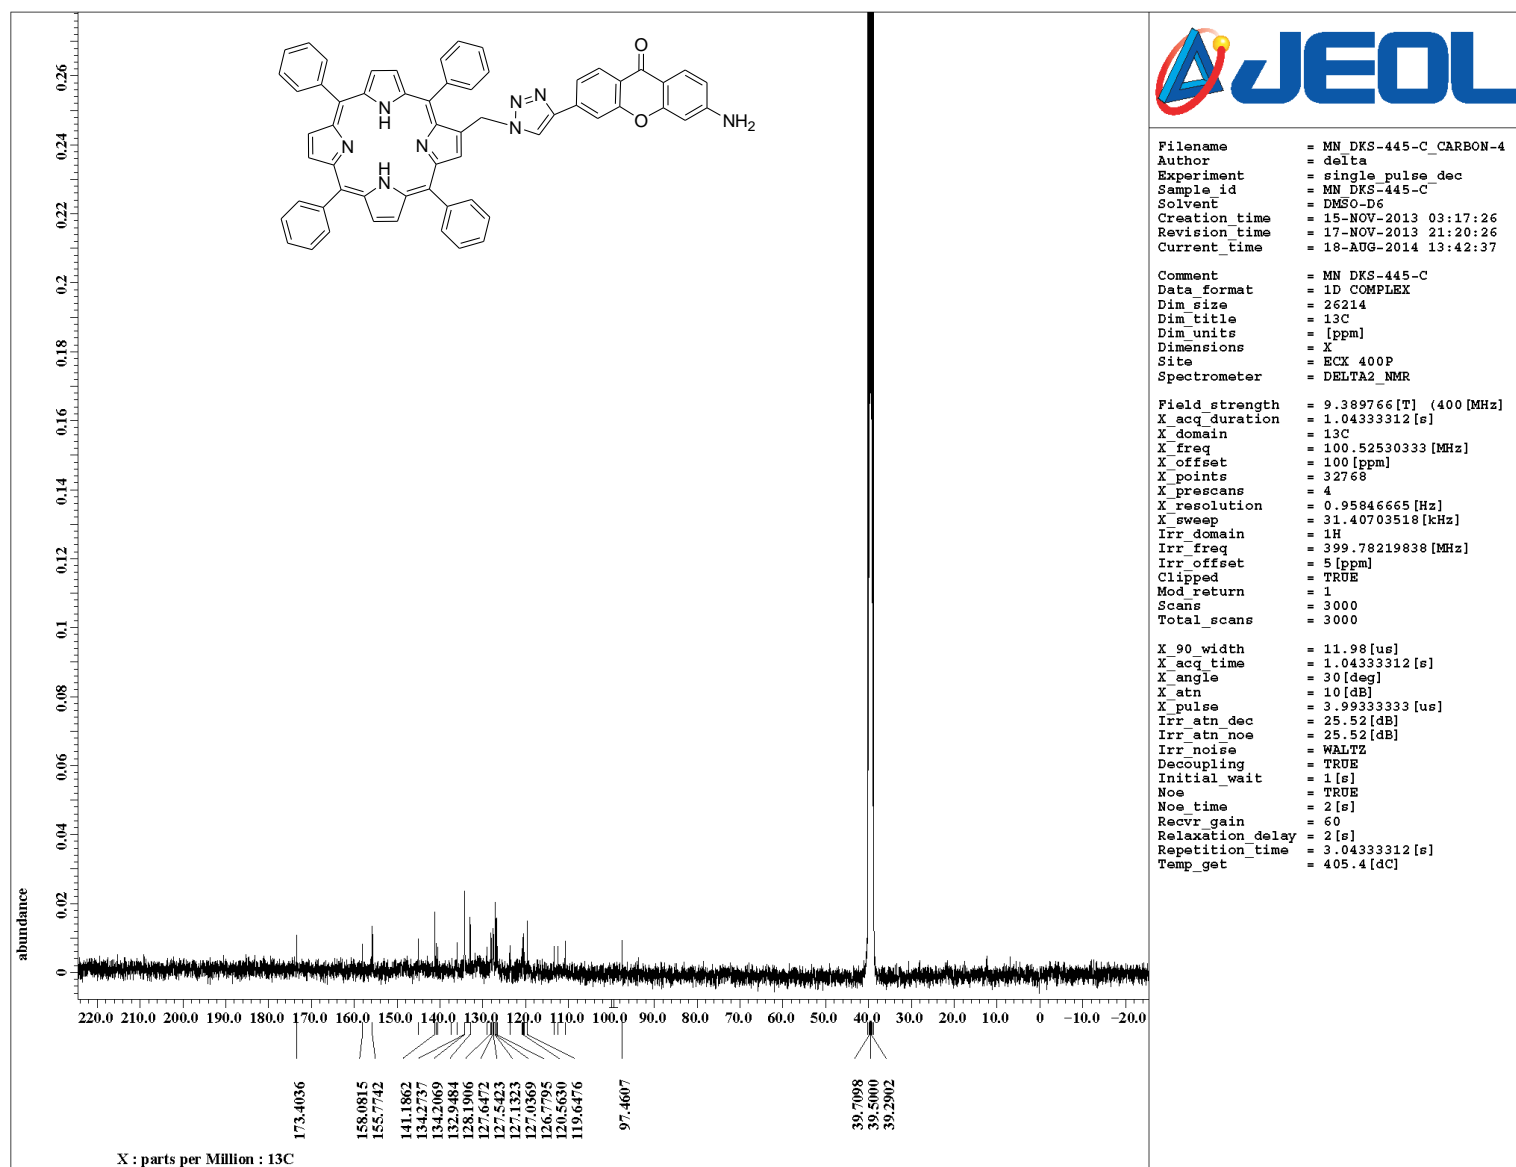

**Figure S20:**  $^{13}\text{C}$  NMR spectrum of compound **7b** in  $\text{DMSO-}d_6$ .

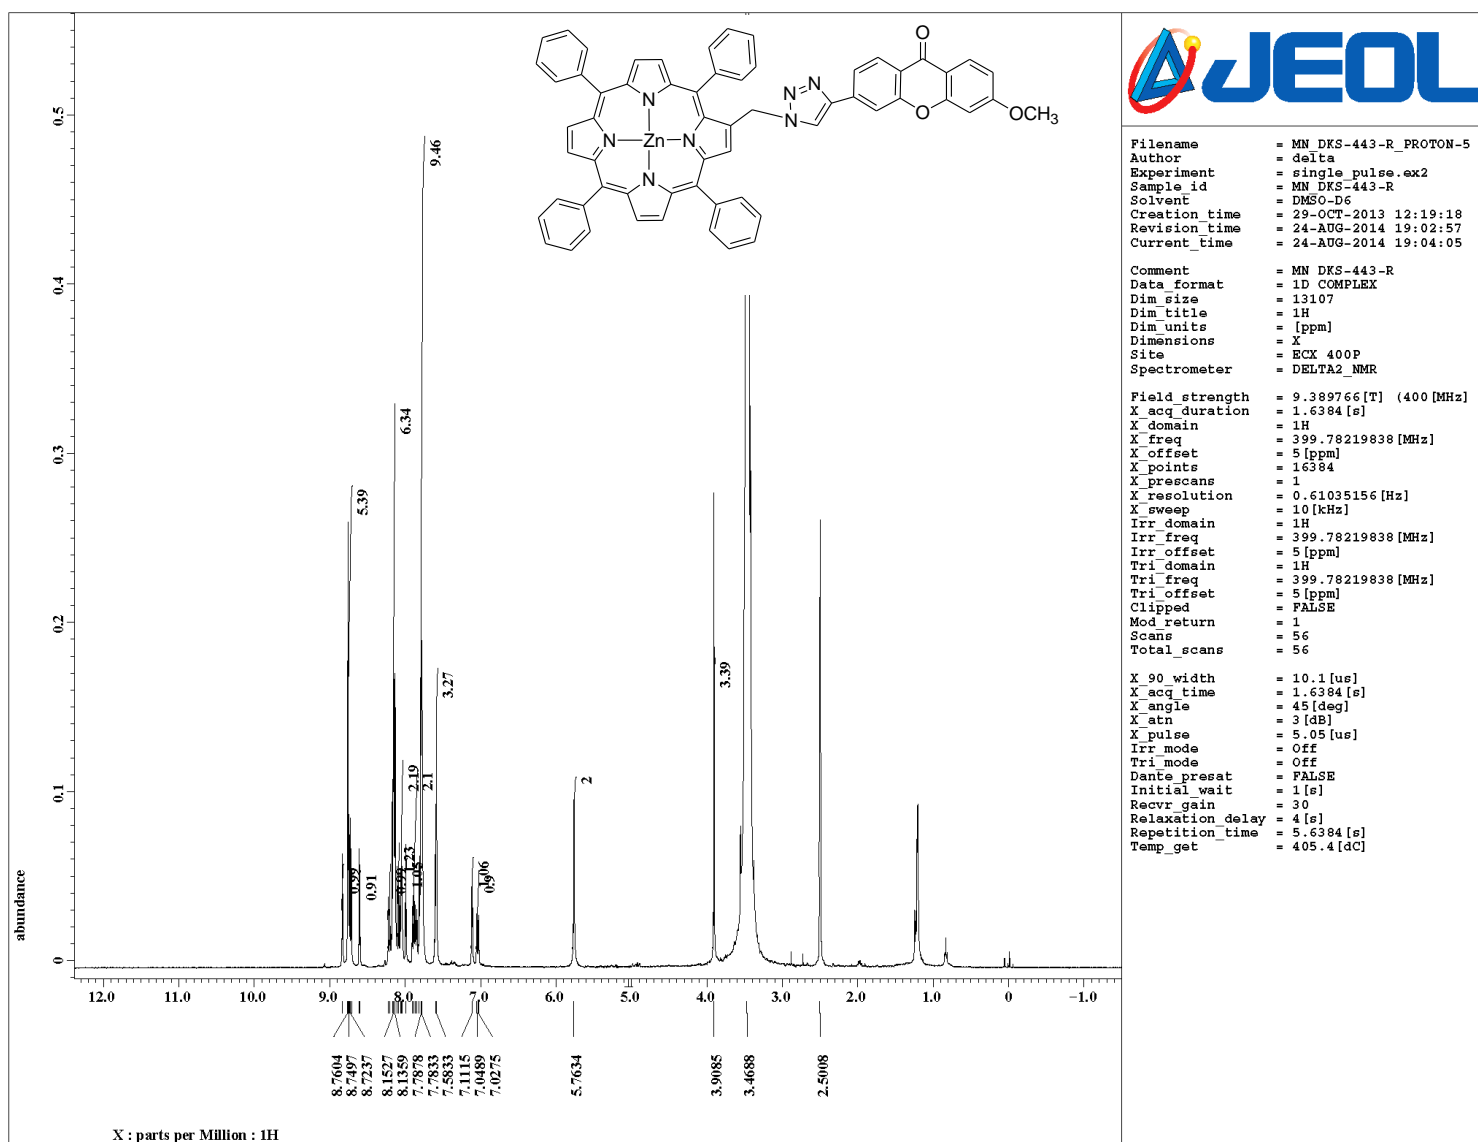

Figure S21:  $^1\text{H}$  NMR spectrum of compound 7c in  $\text{DMSO}-d_6$ .

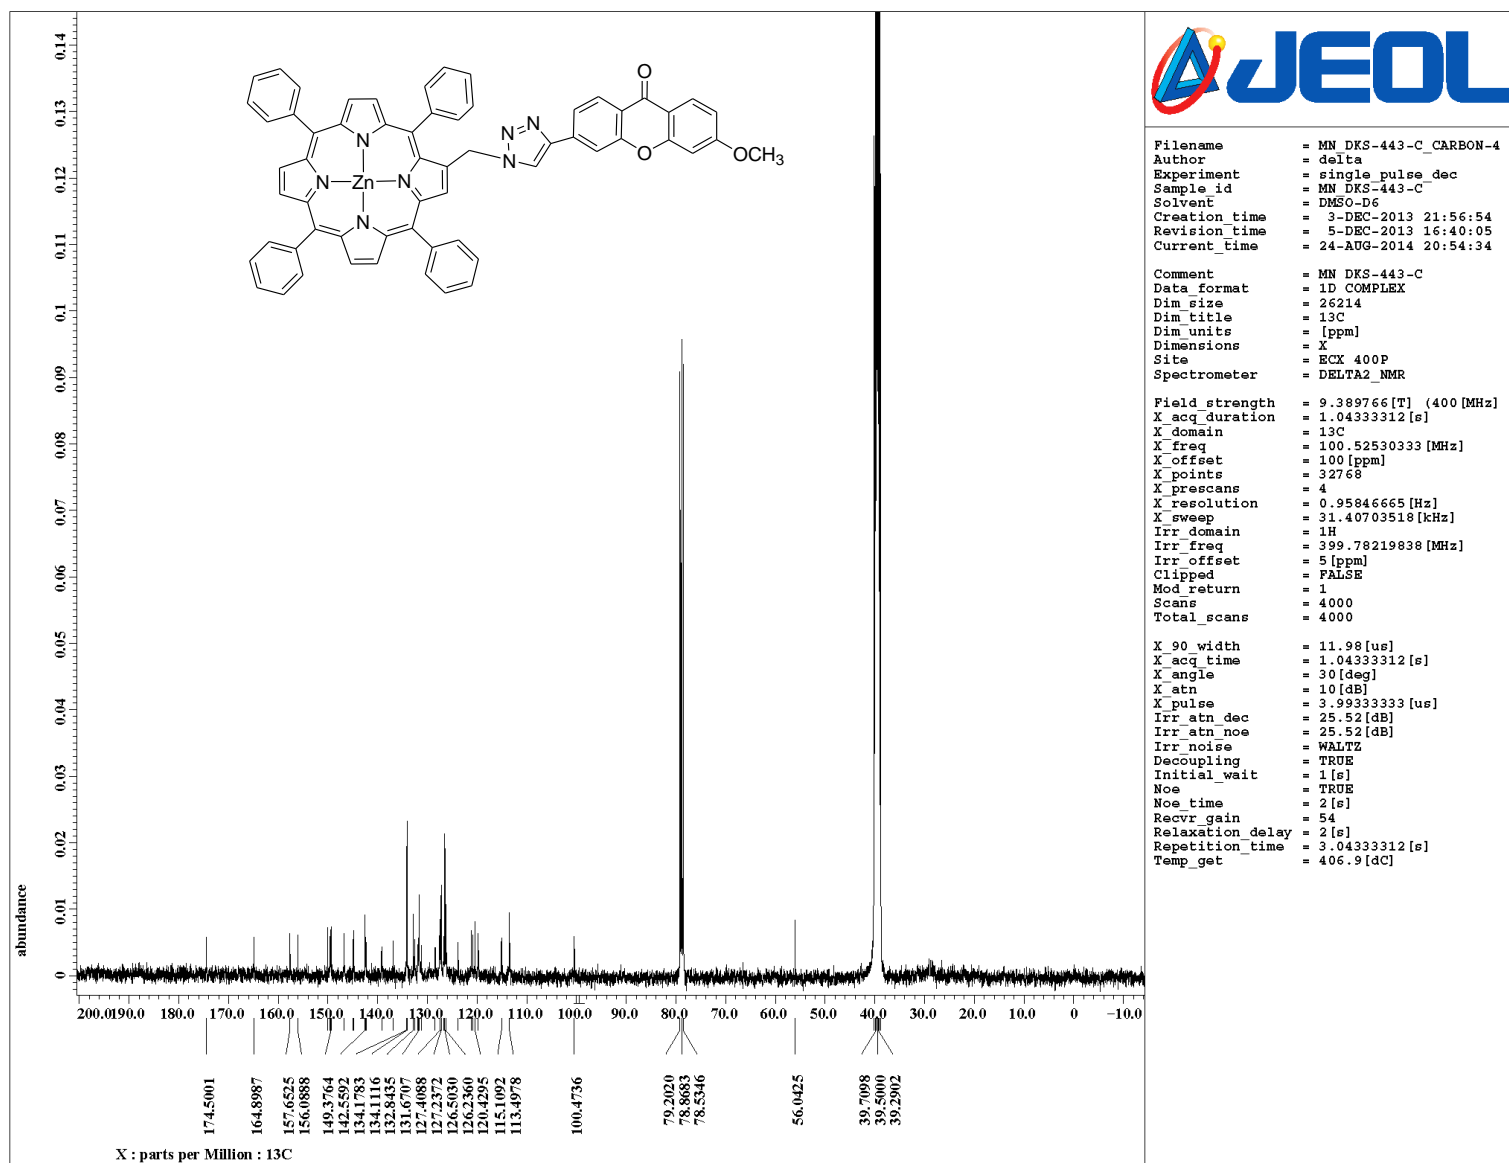

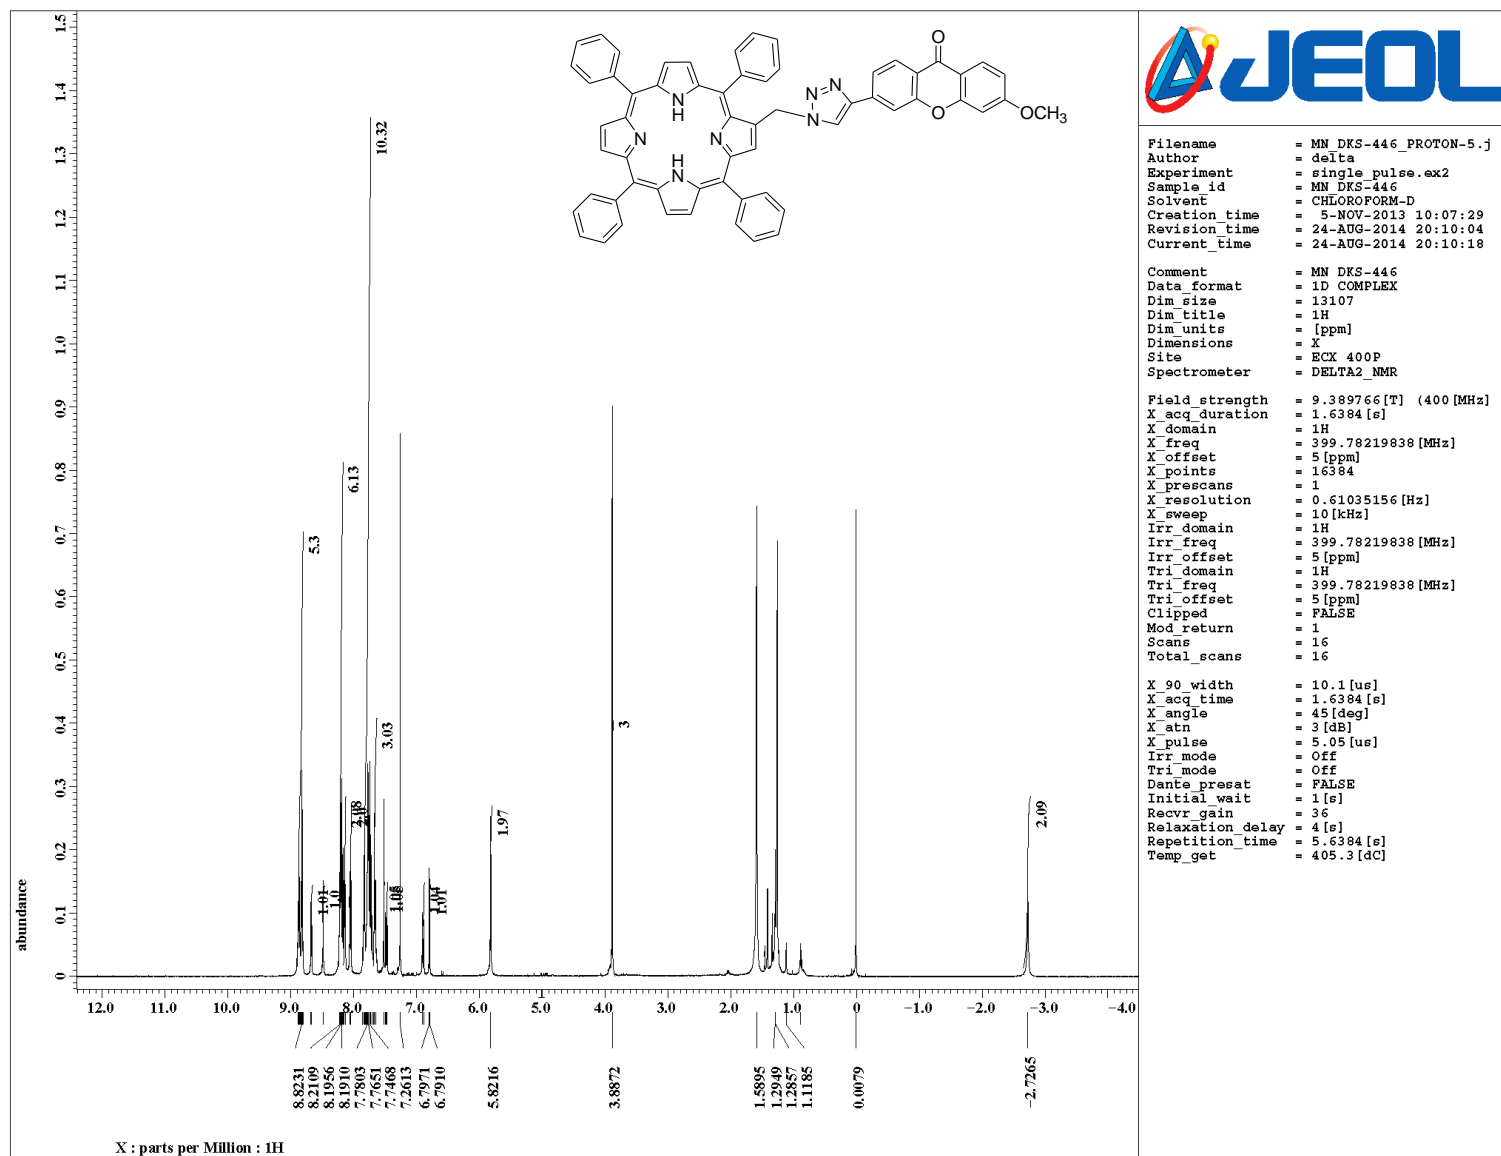

**Figure S23:**  $^1\text{H}$  NMR spectrum of compound **7d** in  $\text{CDCl}_3$ .



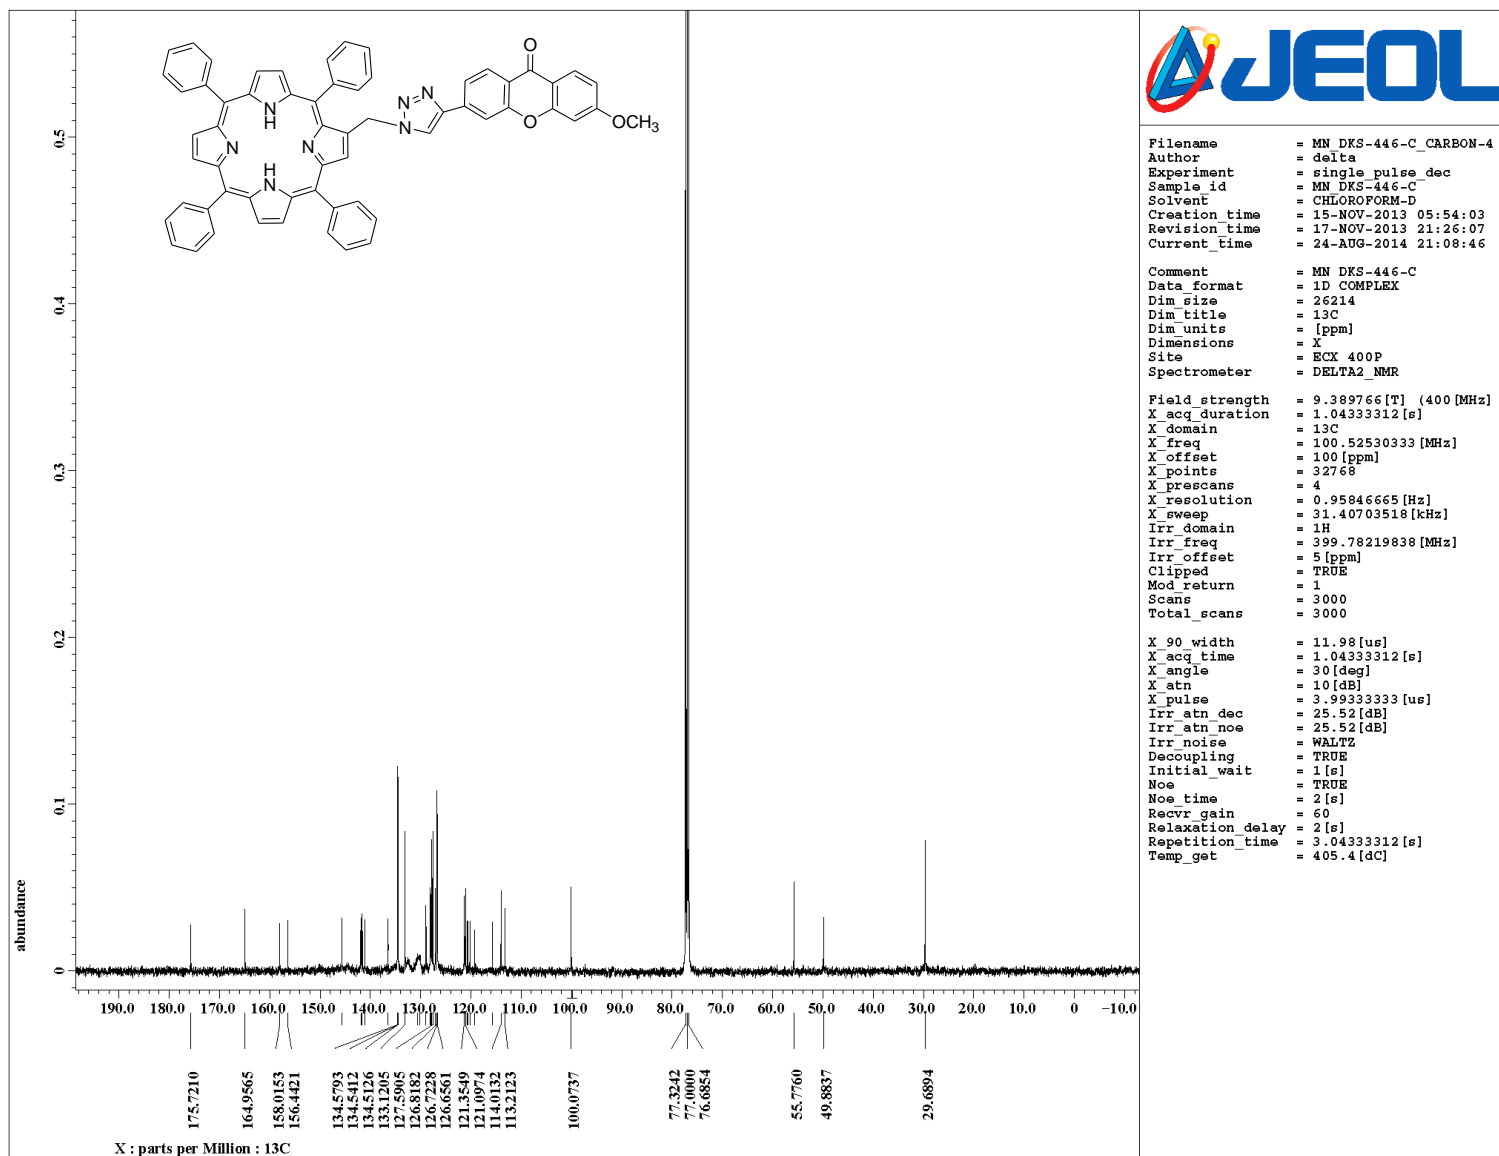

Figure S24:  $^{13}\text{C}$  NMR spectrum of compound **7d** in  $\text{CDCl}_3$ .

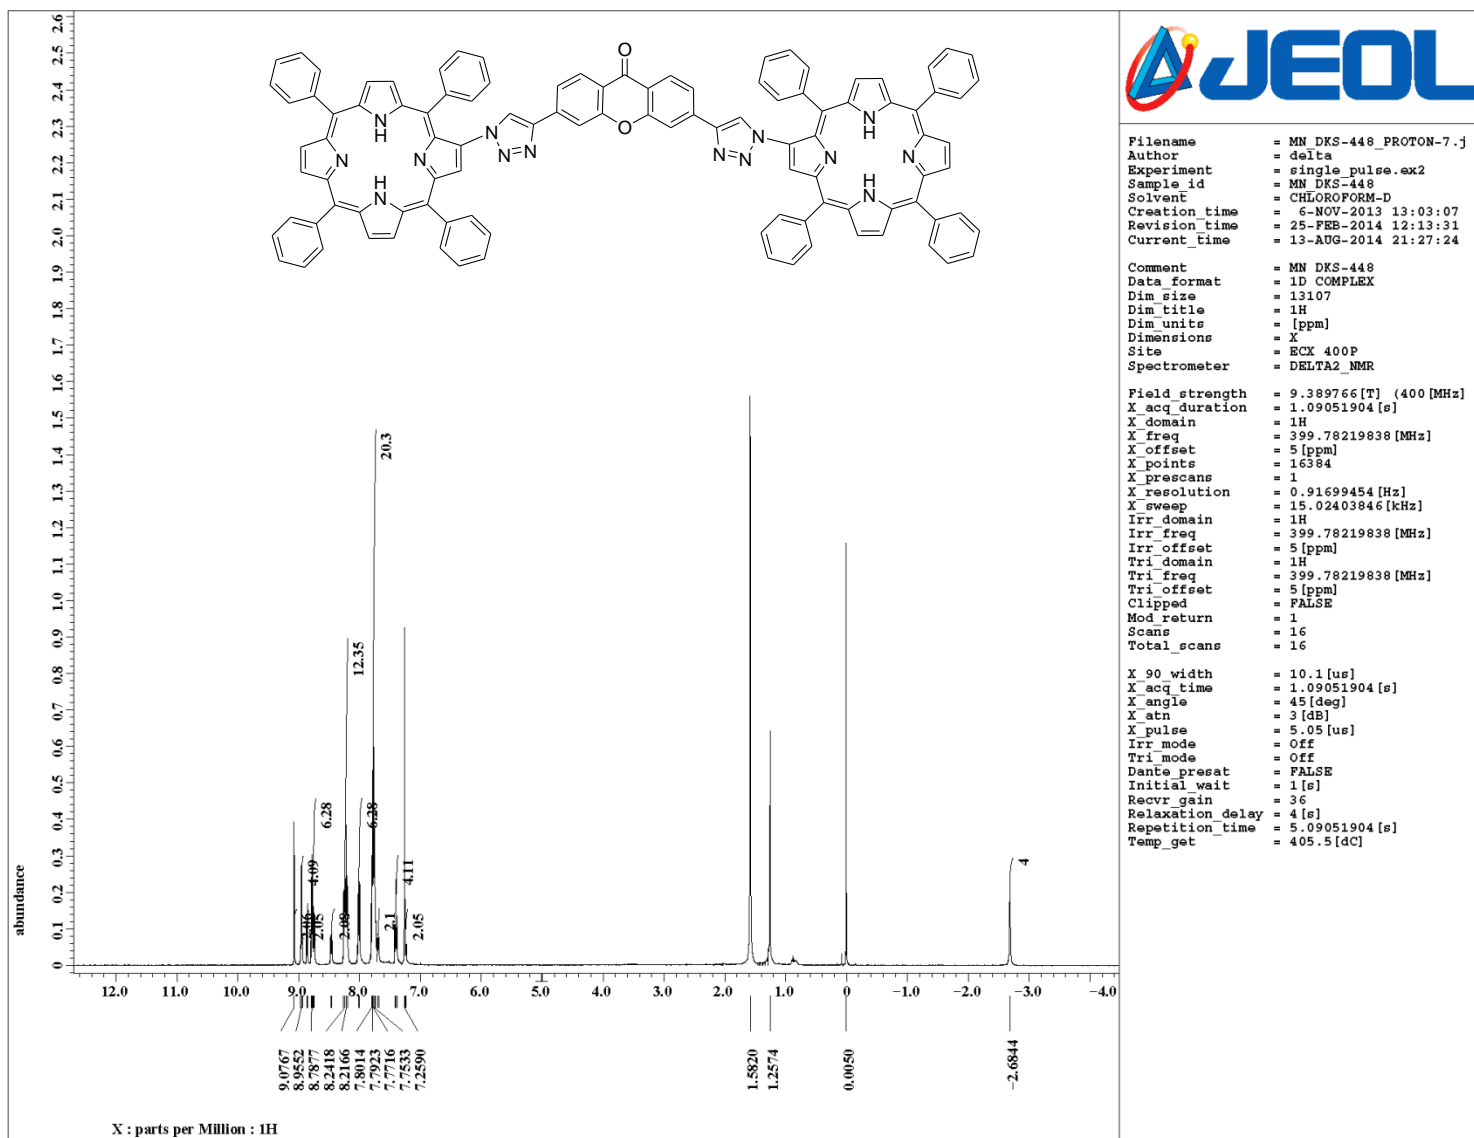

**Figure S25:** <sup>1</sup>H NMR spectrum of compound **12b** in CDCl<sub>3</sub>.

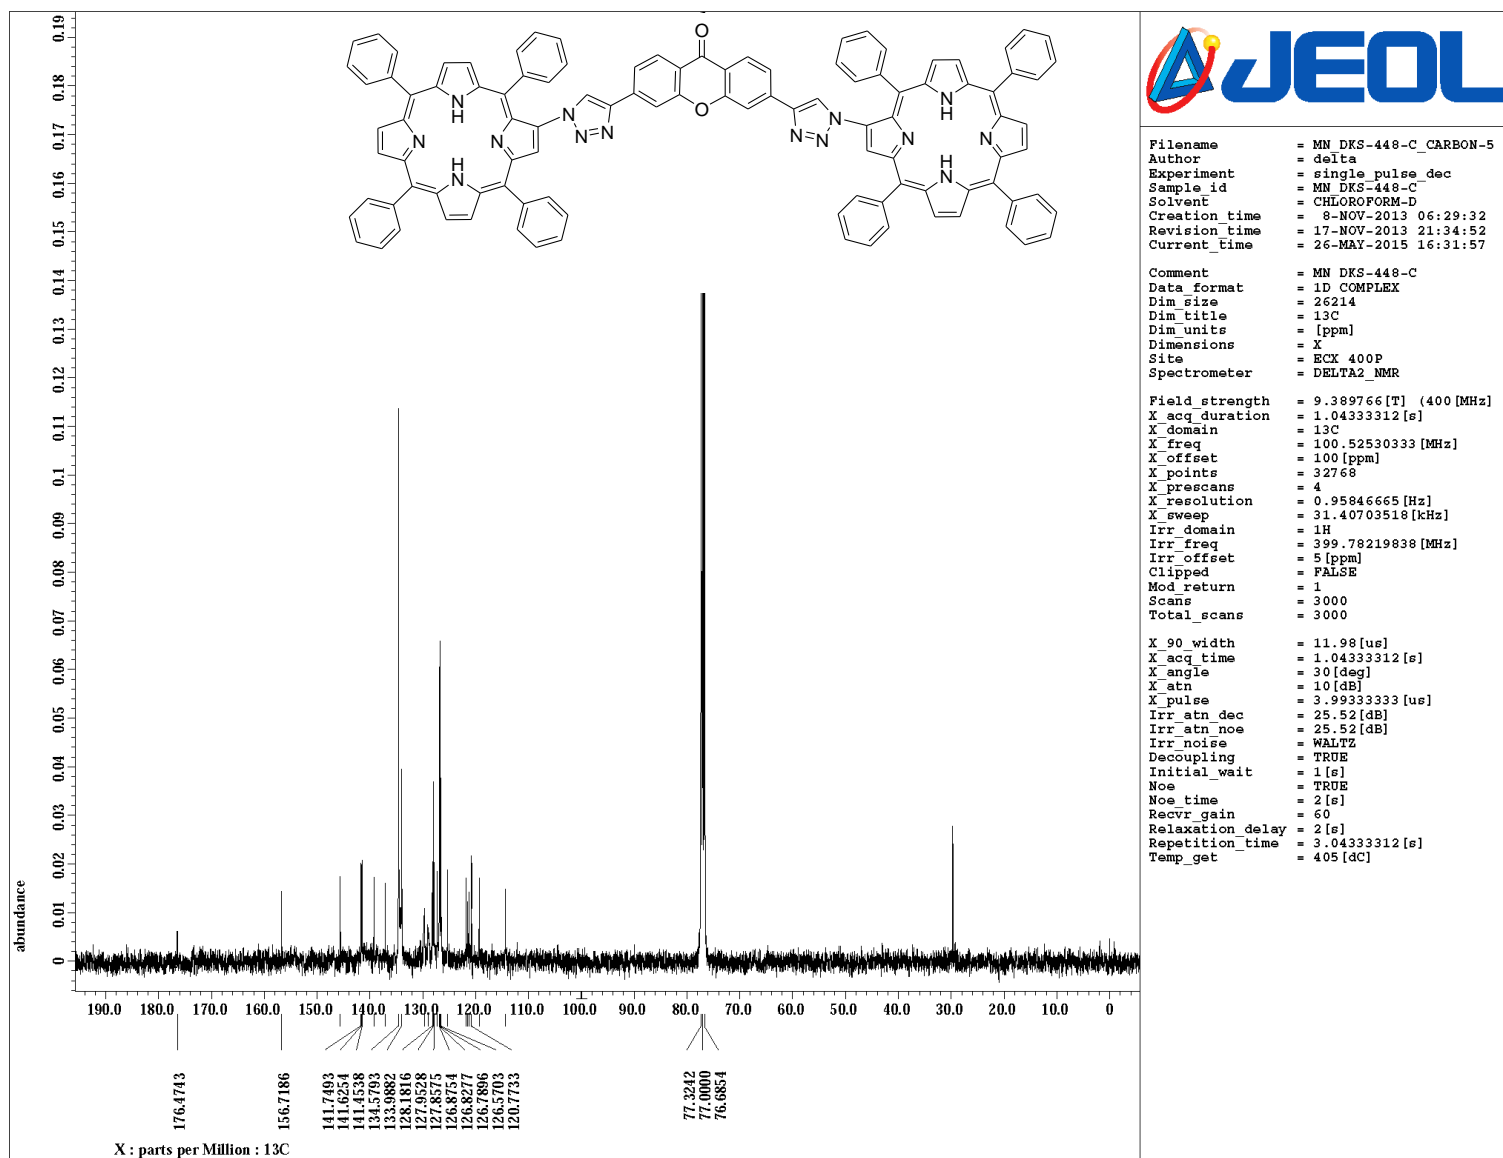

Figure S26:  $^{13}\text{C}$  NMR spectrum of compound **12b** in  $\text{CDCl}_3$ .

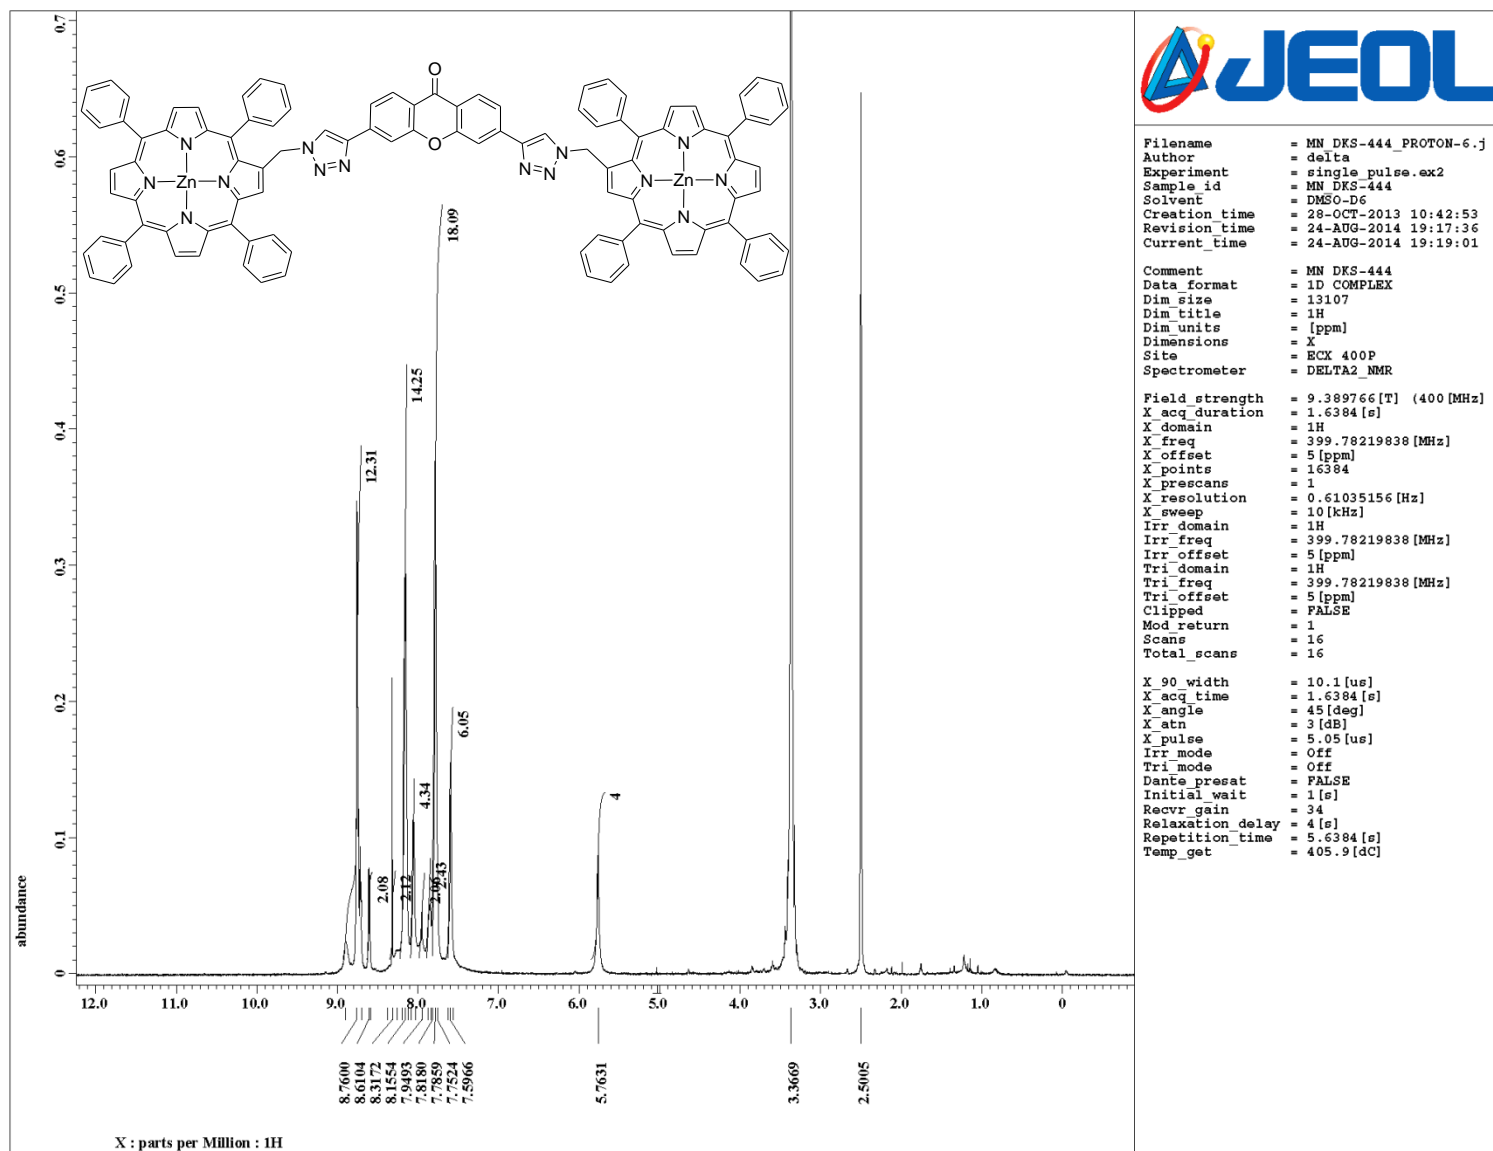

**Figure S27:**  $^1\text{H}$  NMR spectrum of compound **13a** in  $\text{DMSO}-d_6$ .

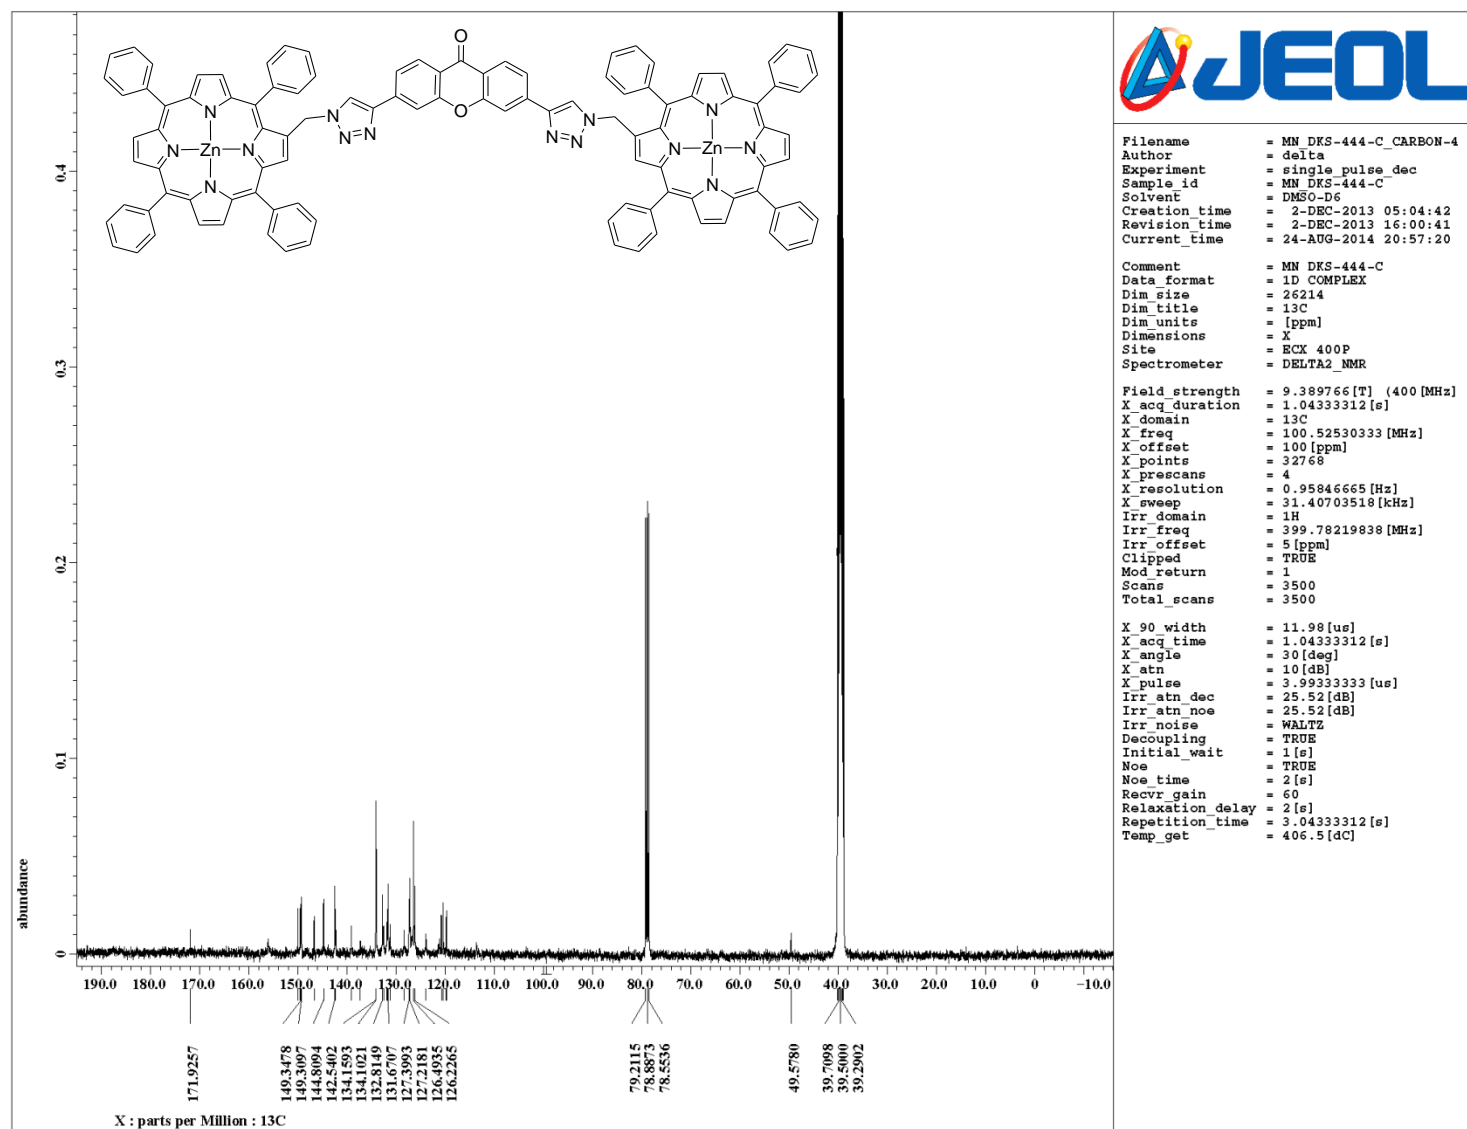

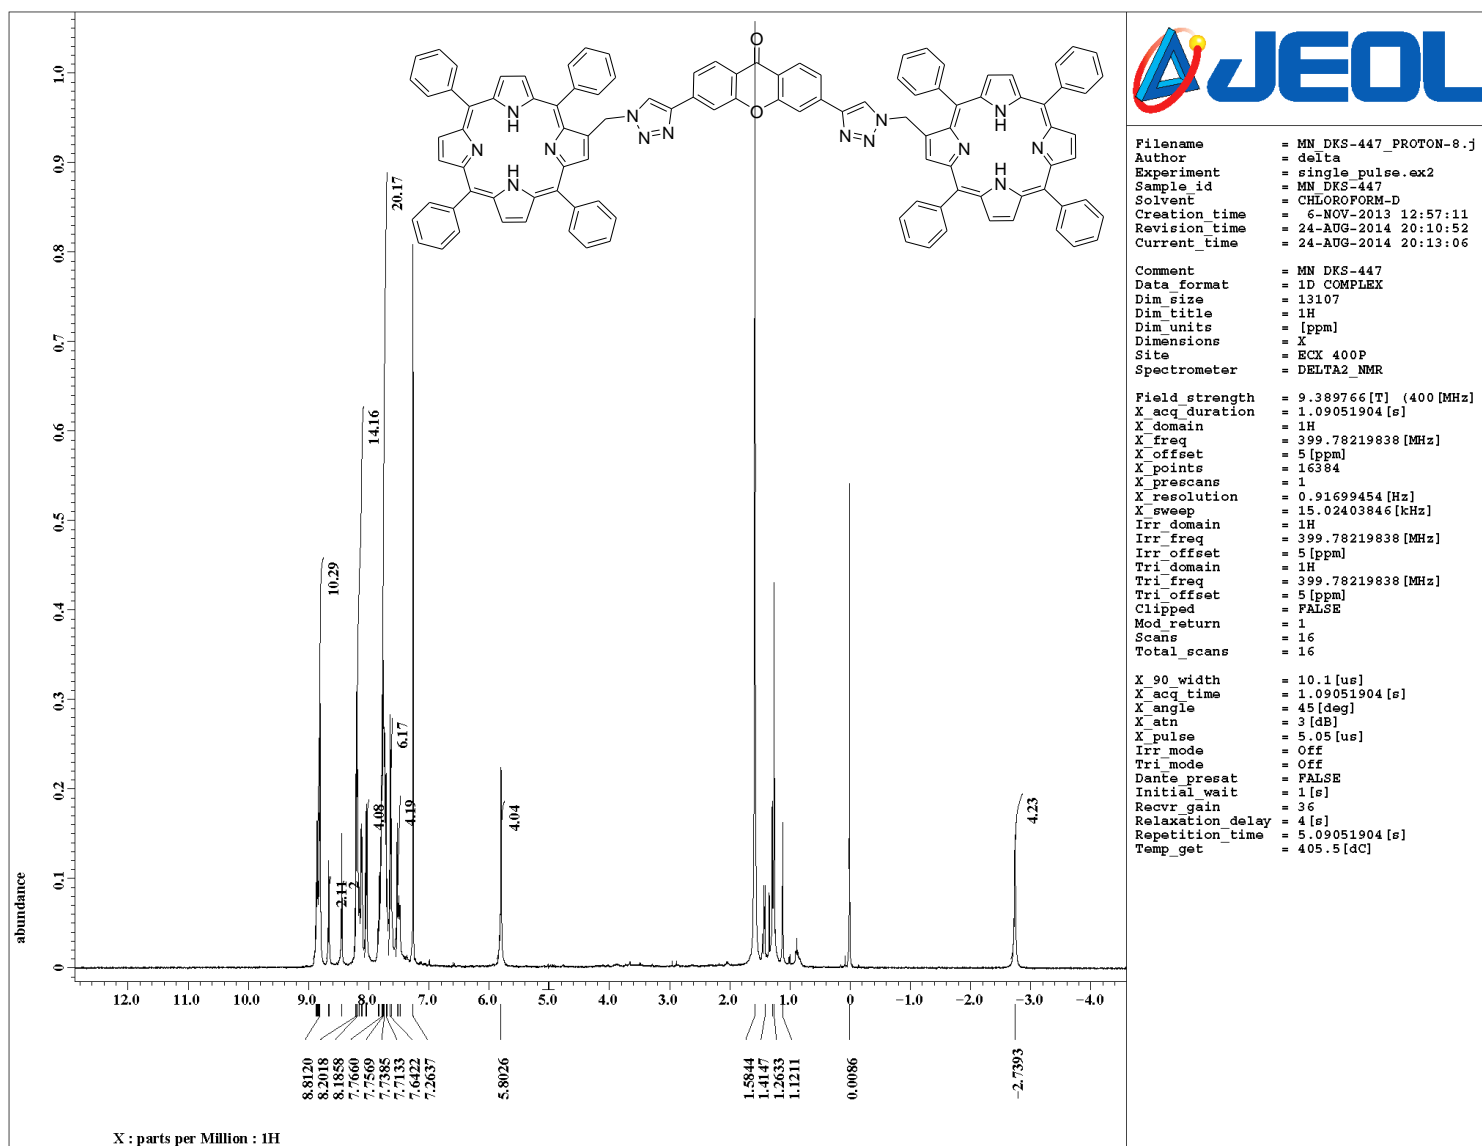

**Figure S29:**  $^1\text{H}$  NMR spectrum of compound **13b** in  $\text{CDCl}_3$ .

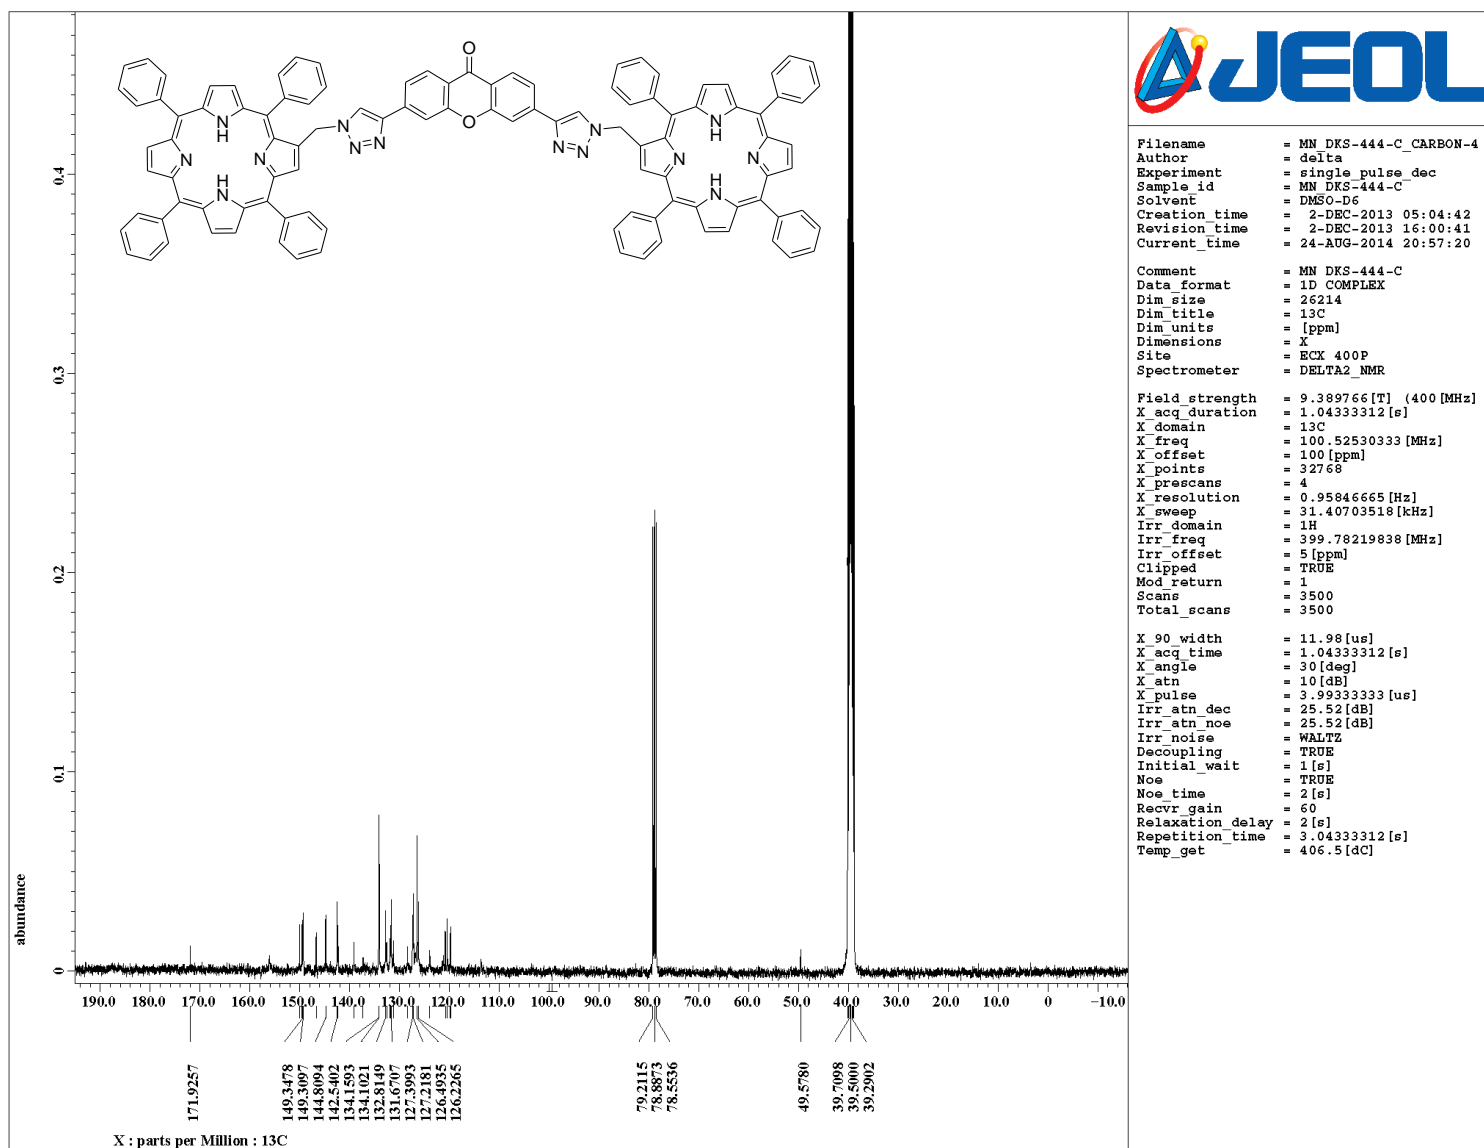

**Figure S30:** <sup>13</sup>C NMR spectrum of compound **13b** in CDCl<sub>3</sub> + DMSO-*d*<sub>6</sub>.
